# Supplementary material for: Birth of protein-coding exons by ancient domestication of LINE-1 retrotransposon
Source: HighWire-hosted journal article supplement (doi:10.1101/gr.280007.124), 2025-05-08
Supplement: Supplemental_Table_S2.xlsx [file Supplemental_Table_S2.xlsx]

## Sheet: Merged
Supplemental Table S2. Summary of genomic analysis for exon L of Lyosin by BLAT search, exon identification, and phylogenetic tree.
Genome	Species	Clade	Query cover by BLAT	Canonital isoform	Neighbor gene	Intact exon	TimeTree
Acanthisitta_chloris_[refseq_GCF_5F000695815.1_2014-05-27]	Acanthisitta_chloris	Aves	0.3894	overlapped	diffrent_scaffold	NA	Included
Accipiter_gentilis_[genbank_GCA_5F012487025.1_2020-04-08]	Accipiter_gentilis	Aves	0.6478	overlapped	diffrent_scaffold	not detected	not included
Accipiter_gentilis_atricapillus_[genbank_GCA_5F017309825.1_2021-03-09]	Accipiter_gentilis_atricapillus	Aves	0.8149	overlapped	<100kb	not detected	Included
Accipiter_nisus_[genbank_GCA_5F004320145.1_2019-02-16]	Accipiter_nisus	Aves	0.6324	overlapped	<100kb	not detected	Included
Acridotheres_javanicus_[genbank_GCA_5F002849675.1_2018-01-02]	Acridotheres_javanicus	Aves	0.3894	overlapped	<100kb	NA	Included
Acrocephalus_arundinaceus_[genbank_GCA_5F013398685.1_2020-07-10]	Acrocephalus_arundinaceus	Aves	0.3894	overlapped	<100kb	NA	Included
Acrocephalus_scirpaceus_scirpaceus_[genbank_GCA_5F910950805.1_2021-08-16]	Acrocephalus_scirpaceus_scirpaceus	Aves	0.3894	overlapped	<100kb	NA	Included
Actinemys_marmorata_[genbank_GCA_5F009430475.1_2019-10-31]	Actinemys_marmorata	Testudines	1	overlapped	<100kb	detected	Included
Aegithalos_caudatus_[genbank_GCA_5F013389925.1_2020-07-06]	Aegithalos_caudatus	Aves	0.381	overlapped	<100kb	NA	Included
Aegotheles_bennettii_[genbank_GCA_5F013398125.1_2020-07-10]	Aegotheles_bennettii	Aves	0.4781	overlapped	<100kb	NA	Included
Agapornis_roseicollis_[genbank_GCA_5F002631895.1_2017-10-23]	Agapornis_roseicollis	Aves	0.4473	overlapped	<100kb	NA	Included
Agelaius_phoeniceus_[genbank_GCA_5F020745825.1_2021-11-05]	Agelaius_phoeniceus	Aves	0.3894	overlapped	<100kb	NA	Included
Agelaius_tricolor_[genbank_GCA_5F017165875.1_2021-03-04]	Agelaius_tricolor	Aves	0.3894	overlapped	<100kb	NA	Included
Alauda_arvensis_[genbank_GCA_5F902810485.1_2020-03-13]	Alauda_arvensis	Aves	0.3894	overlapped	<100kb	NA	Included
Alaudala_cheleensis_[genbank_GCA_5F013398995.1_2020-07-10]	Alaudala_cheleensis	Aves	0.3894	overlapped	<100kb	NA	not included
Alca_torda_[genbank_GCA_5F008658365.1_2019-10-10]	Alca_torda	Aves	0.7147	overlapped	<100kb	not detected	Included
Aleadryas_rufinucha_[genbank_GCA_5F013397815.1_2020-07-10]	Aleadryas_rufinucha	Aves	0.3894	overlapped	<100kb	NA	Included
Alectoris_rufa_[genbank_GCA_5F019345075.1_2021-07-26]	Alectoris_rufa	Aves	0.381	overlapped	diffrent_scaffold	NA	Included
Alectura_lathami_[genbank_GCA_5F013399715.1_2020-07-10]	Alectura_lathami	Aves	0.5604	overlapped	<100kb	not detected	Included
Alligator_mississippiensis_[refseq_GCF_5F000281125.3_2016-03-28]	Alligator_mississippiensis	Crocodilia	1	overlapped	<100kb	detected	Included
Alligator_sinensis_[refseq_GCF_5F000455745.1_2013-08-29]	Alligator_sinensis	Crocodilia	1	overlapped	<100kb	detected	Included
Alopecoenas_beccarii_[genbank_GCA_5F013399365.1_2020-07-10]	Alopecoenas_beccarii	Aves	0.3894	overlapped	diffrent_scaffold	NA	not included
Amazona_aestiva_[genbank_GCA_5F017639355.1_2021-03-30]	Amazona_aestiva	Aves	0.4396	overlapped	<100kb	NA	Included
Amazona_collaria_[genbank_GCA_5F003947215.1_2018-12-14]	Amazona_collaria	Aves	0.4447	overlapped	<100kb	NA	Included
Amazona_guildingii_[genbank_GCA_5F013399615.1_2020-07-10]	Amazona_guildingii	Aves	0.4447	overlapped	<100kb	NA	Included
Amazona_vittata_[genbank_GCA_5F000332375.2_2020-08-28]	Amazona_vittata	Aves	0.4447	overlapped	<100kb	NA	Included
Amblyornis_subalaris_[genbank_GCA_5F018881555.1_2021-06-14]	Amblyornis_subalaris	Aves	0.3894	overlapped	<100kb	NA	not included
Ammodramus_savannarum_pratensis_[genbank_GCA_5F020466415.1_2021-10-13]	Ammodramus_savannarum_pratensis	Aves	0.381	overlapped	<100kb	NA	Included
Anas_platyrhynchos_[refseq_GCF_5F015476345.1_2020-11-23]	Anas_platyrhynchos	Aves	0.4602	overlapped	<100kb	NA	not included
Anas_platyrhynchos_platyrhynchos_[genbank_GCA_5F002743455.1_2017-11-03]	Anas_platyrhynchos_platyrhynchos	Aves	0.4242	overlapped	<100kb	NA	Included
Anas_zonorhyncha_[genbank_GCA_5F002224875.1_2017-07-25]	Anas_zonorhyncha	Aves	0.4936	overlapped	diffrent_scaffold	NA	Included
Anhinga_anhinga_[genbank_GCA_5F013396435.1_2020-07-10]	Anhinga_anhinga	Aves	0.8021	overlapped	<100kb	not detected	Included
Anhinga_rufa_[genbank_GCA_5F013400875.1_2020-07-10]	Anhinga_rufa	Aves	0.3894	overlapped	diffrent_scaffold	NA	not included
Anodorhynchus_hyacinthinus_[genbank_GCA_5F009936445.1_2020-01-27]	Anodorhynchus_hyacinthinus	Aves	0.5141	overlapped	diffrent_scaffold	not detected	Included
Anolis_carolinensis_[refseq_GCF_5F000090745.1_2011-01-10]	Anolis_carolinensis	Squamata	0.7423	overlapped	<100kb	detected	Included
Anomalopteryx_didiformis_[genbank_GCA_5F006937325.1_2019-07-12]	Anomalopteryx_didiformis	Aves	0.9717	overlapped	<100kb	detected	Included
Anser_brachyrhynchus_[genbank_GCA_5F002592135.1_2017-10-19]	Anser_brachyrhynchus	Aves	0.3697	overlapped	<100kb	NA	Included
Anser_cygnoides_[genbank_GCA_5F013030995.1_2020-05-11]	Anser_cygnoides	Aves	0.3894	overlapped	<100kb	NA	not included
Anser_cygnoides_domesticus_[refseq_GCF_5F000971095.1_2015-04-08]	Anser_cygnoides_domesticus	Aves	0.4447	overlapped	<100kb	NA	Included
Anser_indicus_[genbank_GCA_5F006229135.1_2019-06-11]	Anser_indicus	Aves	0.5141	overlapped	<100kb	not detected	Included
Anseranas_semipalmata_[genbank_GCA_5F013399115.1_2020-07-10]	Anseranas_semipalmata	Aves	0.3613	overlapped	diffrent_scaffold	NA	Included
Anthochaera_phrygia_[genbank_GCA_5F009430485.1_2019-10-31]	Anthochaera_phrygia	Aves	0.2409	overlapped	diffrent_scaffold	NA	Included
Anthoscopus_minutus_[genbank_GCA_5F013399455.1_2020-07-10]	Anthoscopus_minutus	Aves	0.3894	overlapped	<100kb	NA	not included
Antigone_vipio_[genbank_GCA_5F012488435.1_2020-04-08]	Antigone_vipio	Aves	0.8509	overlapped	<100kb	not detected	Included
Antrostomus_carolinensis_[refseq_GCF_5F000700745.1_2014-06-10]	Antrostomus_carolinensis	Aves	0.7738	overlapped	diffrent_scaffold	not detected	not included
Apaloderma_vittatum_[refseq_GCF_5F000703405.1_2014-06-16]	Apaloderma_vittatum	Aves	0.4165	overlapped	diffrent_scaffold	NA	Included
Apalone_spinifera_[genbank_GCA_5F000385615.1_2013-05-03]	Apalone_spinifera	Testudines	0.7275	not overlapped	<100kb	NA	Included
Aphelocoma_coerulescens_[genbank_GCA_5F013398375.1_2020-07-10]	Aphelocoma_coerulescens	Aves	0.3894	overlapped	<100kb	NA	Included
Aptenodytes_forsteri_[refseq_GCF_5F000699145.1_2014-06-06]	Aptenodytes_forsteri	Aves	0.7584	overlapped	<100kb	not detected	Included
Aptenodytes_patagonicus_[genbank_GCA_5F010087175.1_2020-01-31]	Aptenodytes_patagonicus	Aves	0.6272	overlapped	<100kb	not detected	Included
Apteryx_haastii_[genbank_GCA_5F003342985.1_2018-07-26]	Apteryx_haastii	Aves	1	overlapped	<100kb	detected	Included
Apteryx_mantelli_mantelli_[genbank_GCA_5F001039765.2_2015-06-23]	Apteryx_mantelli_mantelli	Aves	1	overlapped	<100kb	detected	Included
Apteryx_owenii_[genbank_GCA_5F003342965.1_2018-07-26]	Apteryx_owenii	Aves	1	overlapped	<100kb	detected	Included
Apteryx_rowi_[refseq_GCF_5F003343035.1_2018-07-26]	Apteryx_rowi	Aves	1	overlapped	<100kb	detected	Included
Apus_apus_[genbank_GCA_5F020740795.1_2021-11-04]	Apus_apus	Aves	0.395	overlapped	<100kb	NA	Included
Aquila_chrysaetos_canadensis_[genbank_GCA_5F000766835.1_2014-10-14]	Aquila_chrysaetos_canadensis	Aves	0.5553	overlapped	<100kb	not detected	not included
Aquila_chrysaetos_chrysaetos_[refseq_GCF_5F900496995.4_2021-03-26]	Aquila_chrysaetos_chrysaetos	Aves	0.5553	overlapped	>100kb	not detected	Included
Aquila_chrysaetos_japonica_[genbank_GCA_5F012057345.1_2020-04-03]	Aquila_chrysaetos_japonica	Aves	0.5398	overlapped	<100kb	not detected	not included
Ara_ararauna_[genbank_GCA_5F010014805.1_2020-01-30]	Ara_ararauna	Aves	0.437	overlapped	diffrent_scaffold	NA	Included
Ara_chloropterus_[genbank_GCA_5F010014725.1_2020-01-30]	Ara_chloropterus	Aves	0.437	overlapped	diffrent_scaffold	NA	Included
Ara_glaucogularis_[genbank_GCA_5F013433245.1_2020-07-21]	Ara_glaucogularis	Aves	0.5141	overlapped	<100kb	not detected	Included
Ara_macao_[genbank_GCA_5F000400695.1_2013-06-26]	Ara_macao	Aves	0.3557	overlapped	diffrent_scaffold	NA	Included
Ara_militaris_[genbank_GCA_5F010015965.1_2020-01-30]	Ara_militaris	Aves	0.2493	overlapped	diffrent_scaffold	NA	Included
Aramus_guarauna_[genbank_GCA_5F013400195.1_2020-07-10]	Aramus_guarauna	Aves	0.7429	overlapped	<100kb	not detected	Included
Aratinga_solstitialis_[genbank_GCA_5F902168055.1_2019-11-14]	Aratinga_solstitialis	Aves	0.4602	not overlapped	>100kb	NA	Included
Aratinga_weddellii_[genbank_GCA_5F009867205.1_2020-01-14]	Aratinga_weddellii	Aves	0.437	overlapped	diffrent_scaffold	NA	Included
Ardeotis_arabs_[genbank_GCA_5F011801015.1_2020-03-31]	Ardeotis_arabs	Aves	0.3697	overlapped	diffrent_scaffold	NA	not included
Ardeotis_kori_[genbank_GCA_5F013396375.1_2020-07-10]	Ardeotis_kori	Aves	0.3894	overlapped	diffrent_scaffold	NA	not included
Arenaria_interpres_[genbank_GCA_5F013399435.1_2020-07-10]	Arenaria_interpres	Aves	0.7172	overlapped	<100kb	not detected	Included
Asarcornis_scutulata_[genbank_GCA_5F013398475.1_2020-07-10]	Asarcornis_scutulata	Aves	0.4653	overlapped	<100kb	NA	Included
Aspidoscelis_marmoratus_[genbank_GCA_5F014337955.1_2020-08-31]	Aspidoscelis_marmoratus	Squamata	0.3894	overlapped	<100kb	NA	Included
Athene_cunicularia_[refseq_GCF_5F003259725.1_2018-06-21]	Athene_cunicularia	Aves	0.5964	overlapped	<100kb	not detected	Included
Atlantisia_rogersi_[genbank_GCA_5F013401215.1_2020-07-10]	Atlantisia_rogersi	Aves	0.4987	overlapped	<100kb	NA	Included
Atrichornis_clamosus_[genbank_GCA_5F013400975.1_2020-07-10]	Atrichornis_clamosus	Aves	0.3894	overlapped	<100kb	NA	Included
Aythya_fuligula_[refseq_GCF_5F009819795.1_2019-12-31]	Aythya_fuligula	Aves	0.5476	overlapped	<100kb	not detected	Included
Balaeniceps_rex_[genbank_GCA_5F013401315.1_2020-07-10]	Balaeniceps_rex	Aves	0.8252	overlapped	<100kb	not detected	Included
Balearica_regulorum_gibbericeps_[refseq_GCF_5F000709895.1_2014-06-25]	Balearica_regulorum_gibbericeps	Aves	0.6221	overlapped	diffrent_scaffold	not detected	Included
Bambusicola_thoracicus_[genbank_GCA_5F002909625.1_2018-01-31]	Bambusicola_thoracicus	Aves	0.3894	overlapped	diffrent_scaffold	NA	Included
Baryphthengus_martii_[genbank_GCA_5F013396935.1_2020-07-10]	Baryphthengus_martii	Aves	0.4087	overlapped	<100kb	NA	not included
Bombycilla_garrulus_[genbank_GCA_5F013400315.1_2020-07-10]	Bombycilla_garrulus	Aves	0.3894	overlapped	<100kb	NA	Included
Bothrops_jararaca_[genbank_GCA_5F018340635.1_2021-05-11]	Bothrops_jararaca	Squamata	0.5476	overlapped	<100kb	not detected	Included
Brachypodius_atriceps_[genbank_GCA_5F013398615.1_2020-07-10]	Brachypodius_atriceps	Aves	0.4034	overlapped	<100kb	NA	Included
Brachypteracias_leptosomus_[genbank_GCA_5F013401335.1_2020-07-10]	Brachypteracias_leptosomus	Aves	0.5398	overlapped	<100kb	not detected	Included
Branta_canadensis_[genbank_GCA_5F006130075.1_2019-06-05]	Branta_canadensis	Aves	0.4344	overlapped	<100kb	NA	Included
Bubo_blakistoni_[genbank_GCA_5F004320225.1_2019-02-16]	Bubo_blakistoni	Aves	0.6324	overlapped	<100kb	not detected	not included
Bubo_bubo_[genbank_GCA_5F010303855.1_2020-02-04]	Bubo_bubo	Aves	0.581	overlapped	<100kb	not detected	Included
Bubo_scandiacus_[genbank_GCA_5F017315185.1_2021-03-09]	Bubo_scandiacus	Aves	0.6401	overlapped	<100kb	not detected	Included
Bucco_capensis_[genbank_GCA_5F013396975.1_2020-07-10]	Bucco_capensis	Aves	0.4653	overlapped	diffrent_scaffold	NA	Included
Buceros_rhinoceros_silvestris_[refseq_GCF_5F000710305.1_2014-06-25]	Buceros_rhinoceros_silvestris	Aves	0.4576	overlapped	diffrent_scaffold	NA	Included
Bucorvus_abyssinicus_[genbank_GCA_5F009769605.1_2019-12-23]	Bucorvus_abyssinicus	Aves	0.4293	overlapped	<100kb	NA	Included
Buphagus_erythrorhynchus_[genbank_GCA_5F013400855.1_2020-07-10]	Buphagus_erythrorhynchus	Aves	0.3894	overlapped	diffrent_scaffold	NA	Included
Burhinus_bistriatus_[genbank_GCA_5F013397275.1_2020-07-10]	Burhinus_bistriatus	Aves	0.563	overlapped	<100kb	not detected	not included
Burhinus_oedicnemus_[genbank_GCA_5F008921705.1_2019-10-08]	Burhinus_oedicnemus	Aves	0.874	overlapped	<100kb	not detected	Included
Buteo_japonicus_[genbank_GCA_5F010312235.1_2020-02-04]	Buteo_japonicus	Aves	0.6632	overlapped	<100kb	not detected	not included
Cairina_moschata_[genbank_GCA_5F018104995.1_2021-04-23]	Cairina_moschata	Aves	0.5501	overlapped	<100kb	not detected	not included
Cairina_moschata_domestica_[genbank_GCA_5F009194515.1_2019-11-25]	Cairina_moschata_domestica	Aves	0.3894	overlapped	<100kb	NA	Included
Calcarius_ornatus_[genbank_GCA_5F013397715.1_2020-07-10]	Calcarius_ornatus	Aves	0.3894	overlapped	<100kb	NA	Included
Calidris_pugnax_[refseq_GCF_5F001431845.1_2015-11-04]	Calidris_pugnax	Aves	0.6992	overlapped	<100kb	not detected	Included
Calidris_pygmaea_[genbank_GCA_5F003697955.1_2018-10-30]	Calidris_pygmaea	Aves	0.6992	overlapped	<100kb	not detected	not included
Callaeas_wilsoni_[genbank_GCA_5F013398955.1_2020-07-10]	Callaeas_wilsoni	Aves	0.3894	overlapped	<100kb	NA	Included
Callipepla_squamata_[genbank_GCA_5F002218305.1_2017-07-13]	Callipepla_squamata	Aves	0.3978	overlapped	<100kb	NA	Included
Caloenas_nicobarica_[genbank_GCA_5F013398195.1_2020-07-10]	Caloenas_nicobarica	Aves	0.3697	overlapped	diffrent_scaffold	NA	Included
Calonectris_borealis_[genbank_GCA_5F013401115.1_2020-07-10]	Calonectris_borealis	Aves	0.7763	overlapped	<100kb	not detected	not included
Calotes_versicolor_[genbank_GCA_5F020711275.1_2021-11-02]	Calotes_versicolor	Squamata	0.2801	overlapped	diffrent_scaffold	NA	Included
Calypte_anna_[genbank_GCA_5F003957555.2_2019-05-17]	Calypte_anna	Aves	0.3894	not overlapped	<100kb	NA	Included
Calyptomena_viridis_[genbank_GCA_5F013390005.1_2020-07-06]	Calyptomena_viridis	Aves	0.3866	overlapped	diffrent_scaffold	NA	Included
Camarhynchus_parvulus_[refseq_GCF_5F901933205.1_2019-09-06]	Camarhynchus_parvulus	Aves	0.3922	overlapped	<100kb	NA	Included
Campylorhamphus_procurvoides_[genbank_GCA_5F013396655.1_2020-07-10]	Campylorhamphus_procurvoides	Aves	0.3894	overlapped	<100kb	NA	Included
Caprimulgus_europaeus_[genbank_GCA_5F907165065.1_2021-05-17]	Caprimulgus_europaeus	Aves	0.381	overlapped	diffrent_scaffold	NA	Included
Cardinalis_cardinalis_[genbank_GCA_5F014549065.1_2020-09-15]	Cardinalis_cardinalis	Aves	0.4034	overlapped	<100kb	NA	Included
Carettochelys_insculpta_[genbank_GCA_5F007922185.1_2019-08-05]	Carettochelys_insculpta	Testudines	0.9974	overlapped	<100kb	detected	Included
Cariama_cristata_[refseq_GCF_5F000690535.1_2014-05-12]	Cariama_cristata	Aves	0.653	overlapped	diffrent_scaffold	not detected	Included
Casuarius_casuarius_[genbank_GCA_5F003342895.1_2018-07-26]	Casuarius_casuarius	Aves	0.9974	overlapped	<100kb	not detected	Included
Cathartes_aura_[genbank_GCA_5F000699945.1_2014-06-11]	Cathartes_aura	Aves	0.8715	overlapped	diffrent_scaffold	not detected	Included
Catharus_fuscescens_[genbank_GCA_5F013398975.1_2020-07-10]	Catharus_fuscescens	Aves	0.3894	overlapped	<100kb	NA	Included
Catharus_ustulatus_[refseq_GCF_5F009819885.2_2020-12-22]	Catharus_ustulatus	Aves	0.3894	overlapped	<100kb	NA	Included
Centrocercus_minimus_[genbank_GCA_5F005890655.1_2019-06-14]	Centrocercus_minimus	Aves	0.4961	overlapped	<100kb	NA	Included
Centrocercus_urophasianus_[refseq_GCF_5F019232065.1_2021-07-15]	Centrocercus_urophasianus	Aves	0.5013	overlapped	<100kb	not detected	Included
Centropus_bengalensis_[genbank_GCA_5F013400815.1_2020-07-10]	Centropus_bengalensis	Aves	0.3894	overlapped	diffrent_scaffold	NA	Included
Centropus_unirufus_[genbank_GCA_5F013397695.1_2020-07-10]	Centropus_unirufus	Aves	0.3894	overlapped	diffrent_scaffold	NA	not included
Cephalopterus_ornatus_[genbank_GCA_5F013396775.1_2020-07-10]	Cephalopterus_ornatus	Aves	0.3894	overlapped	<100kb	NA	Included
Cepphus_grylle_[genbank_GCA_5F013401065.1_2020-07-10]	Cepphus_grylle	Aves	0.7172	overlapped	<100kb	not detected	Included
Cercotrichas_coryphoeus_[genbank_GCA_5F013398595.1_2020-07-10]	Cercotrichas_coryphoeus	Aves	0.3894	overlapped	<100kb	NA	Included
Certhia_americana_[genbank_GCA_5F018697195.1_2021-06-03]	Certhia_americana	Aves	0.3894	overlapped	<100kb	NA	not included
Certhia_brachydactyla_[genbank_GCA_5F013400355.1_2020-07-10]	Certhia_brachydactyla	Aves	0.3894	overlapped	<100kb	NA	Included
Certhia_familiaris_[genbank_GCA_5F013398575.1_2020-07-10]	Certhia_familiaris	Aves	0.3894	overlapped	<100kb	NA	Included
Cettia_cetti_[genbank_GCA_5F013401135.1_2020-07-10]	Cettia_cetti	Aves	0.3894	overlapped	<100kb	NA	Included
Ceuthmochares_aereus_[genbank_GCA_5F013398935.1_2020-07-10]	Ceuthmochares_aereus	Aves	0.3838	overlapped	diffrent_scaffold	NA	not included
Ceyx_cyanopectus_[genbank_GCA_5F013401355.1_2020-07-10]	Ceyx_cyanopectus	Aves	0.3754	overlapped	diffrent_scaffold	NA	Included
Chaetops_frenatus_[genbank_GCA_5F013400775.1_2020-07-10]	Chaetops_frenatus	Aves	0.409	overlapped	<100kb	NA	Included
Chaetorhynchus_papuensis_[genbank_GCA_5F013396525.1_2020-07-10]	Chaetorhynchus_papuensis	Aves	0.3894	overlapped	<100kb	NA	Included
Chaetura_pelagica_[refseq_GCF_5F000747805.1_2014-09-04]	Chaetura_pelagica	Aves	0.395	overlapped	<100kb	NA	Included
Charadrius_alexandrinus_[genbank_GCA_5F008711295.1_2019-09-27]	Charadrius_alexandrinus	Aves	0.7609	overlapped	<100kb	not detected	Included
Charadrius_vociferus_[refseq_GCF_5F000708025.1_2014-08-05]	Charadrius_vociferus	Aves	0.7661	overlapped	<100kb	not detected	Included
Chauna_torquata_[genbank_GCA_5F013399475.1_2020-07-10]	Chauna_torquata	Aves	0.4884	overlapped	<100kb	NA	Included
Chelonia_mydas_[refseq_GCF_5F015237465.2_2021-07-15]	Chelonia_mydas	Testudines	0.9974	overlapped	<100kb	detected	Included
Chelonoidis_abingdonii_[refseq_GCF_5F003597395.1_2018-09-25]	Chelonoidis_abingdonii	Testudines	1	overlapped	<100kb	detected	Included
Chelydra_serpentina_[genbank_GCA_5F018859375.1_2021-06-11]	Chelydra_serpentina	Testudines	0.9486	overlapped	<100kb	detected	Included
Chionis_minor_[genbank_GCA_5F013398295.1_2020-07-10]	Chionis_minor	Aves	0.7455	overlapped	<100kb	not detected	Included
Chiroxiphia_lanceolata_[refseq_GCF_5F009829145.1_2020-01-03]	Chiroxiphia_lanceolata	Aves	0.4006	overlapped	<100kb	NA	Included
Chlamydotis_macqueenii_[refseq_GCF_5F000695195.1_2014-06-02]	Chlamydotis_macqueenii	Aves	0.3894	overlapped	diffrent_scaffold	NA	Included
Chlamydotis_undulata_undulata_[genbank_GCA_5F003400225.2_2020-12-15]	Chlamydotis_undulata_undulata	Aves	0.3894	overlapped	diffrent_scaffold	NA	Included
Chloebia_gouldiae_[genbank_GCA_5F003676055.1_2018-10-23]	Chloebia_gouldiae	Aves	0.4034	overlapped	<100kb	NA	Included
Chloroceryle_aenea_[genbank_GCA_5F013399075.1_2020-07-10]	Chloroceryle_aenea	Aves	0.473	overlapped	<100kb	NA	Included
Chlorodrepanis_virens_[genbank_GCA_5F003286495.1_2018-07-02]	Chlorodrepanis_virens	Aves	0.3894	overlapped	<100kb	NA	Included
Chloropsis_cyanopogon_[genbank_GCA_5F013400585.1_2020-07-10]	Chloropsis_cyanopogon	Aves	0.3894	overlapped	<100kb	NA	not included
Chloropsis_hardwickii_[genbank_GCA_5F013390065.1_2020-07-06]	Chloropsis_hardwickii	Aves	0.3894	overlapped	<100kb	NA	Included
Chordeiles_acutipennis_[genbank_GCA_5F013399635.1_2020-07-10]	Chordeiles_acutipennis	Aves	0.6684	overlapped	<100kb	not detected	not included
Chroicocephalus_maculipennis_[genbank_GCA_5F013397655.1_2020-07-10]	Chroicocephalus_maculipennis	Aves	0.5501	overlapped	<100kb	not detected	Included
Chrysemys_picta_bellii_[refseq_GCF_5F000241765.4_2020-08-21]	Chrysemys_picta_bellii	Testudines	1	overlapped	<100kb	detected	Included
Chrysolophus_pictus_[genbank_GCA_5F003413605.1_2018-08-20]	Chrysolophus_pictus	Aves	0.5116	overlapped	<100kb	not detected	Included
Chrysopelea_ornata_[genbank_GCA_5F019457695.1_2021-08-06]	Chrysopelea_ornata	Squamata	0.4422	overlapped	diffrent_scaffold	NA	Included
Chunga_burmeisteri_[genbank_GCA_5F013396505.1_2020-07-10]	Chunga_burmeisteri	Aves	0.7069	overlapped	<100kb	not detected	Included
Ciccaba_nigrolineata_[genbank_GCA_5F013396715.1_2020-07-10]	Ciccaba_nigrolineata	Aves	0.6401	overlapped	<100kb	not detected	not included
Cicinnurus_regius_[genbank_GCA_5F003713305.1_2018-11-06]	Cicinnurus_regius	Aves	0.3894	overlapped	<100kb	NA	Included
Ciconia_boyciana_[genbank_GCA_5F002002965.1_2017-02-09]	Ciconia_boyciana	Aves	0.9023	overlapped	diffrent_scaffold	not detected	Included
Ciconia_maguari_[genbank_GCA_5F017639555.1_2021-03-30]	Ciconia_maguari	Aves	0.8046	overlapped	<100kb	not detected	not included
Cinclus_mexicanus_[genbank_GCA_5F013399935.1_2020-07-10]	Cinclus_mexicanus	Aves	0.4146	overlapped	<100kb	NA	Included
Circaetus_pectoralis_[genbank_GCA_5F013399555.1_2020-07-10]	Circaetus_pectoralis	Aves	0.7378	overlapped	<100kb	not detected	not included
Cisticola_juncidis_[genbank_GCA_5F013400215.1_2020-07-10]	Cisticola_juncidis	Aves	0.3894	overlapped	<100kb	NA	Included
Climacteris_rufus_[genbank_GCA_5F013398175.1_2020-07-10]	Climacteris_rufus	Aves	0.3894	overlapped	<100kb	NA	Included
Cnemophilus_loriae_[genbank_GCA_5F013397755.1_2020-07-10]	Cnemophilus_loriae	Aves	0.4118	overlapped	<100kb	NA	not included
Cochlearius_cochlearius_[genbank_GCA_5F013396365.1_2020-07-10]	Cochlearius_cochlearius	Aves	0.617	overlapped	<100kb	not detected	Included
Colaptes_auratus_[genbank_GCA_5F015227895.2_2021-12-06]	Colaptes_auratus	Aves	0.4679	overlapped	<100kb	NA	Included
Colinus_virginianus_[genbank_GCA_5F008692595.2_2021-04-29]	Colinus_virginianus	Aves	0.3978	overlapped	<100kb	NA	Included
Colius_striatus_[refseq_GCF_5F000690715.1_2014-05-13]	Colius_striatus	Aves	0.3894	overlapped	diffrent_scaffold	NA	Included
Coloeus_monedula_[genbank_GCA_5F013407035.1_2020-07-13]	Coloeus_monedula	Aves	0.3894	overlapped	<100kb	NA	Included
Columba_janthina_nitens_[genbank_GCA_5F014362705.1_2020-08-22]	Columba_janthina_nitens	Aves	0.3894	overlapped	diffrent_scaffold	NA	Included
Columba_livia_[genbank_GCA_5F000337935.2_2017-12-13]	Columba_livia	Aves	0.3697	overlapped	diffrent_scaffold	NA	Included
Columbina_picui_[genbank_GCA_5F013397635.1_2020-07-10]	Columbina_picui	Aves	0.3894	overlapped	diffrent_scaffold	NA	Included
Copsychus_sechellarum_[genbank_GCA_5F013398635.1_2020-07-10]	Copsychus_sechellarum	Aves	0.4034	overlapped	<100kb	NA	Included
Corapipo_altera_[refseq_GCF_5F003945725.1_2018-12-14]	Corapipo_altera	Aves	0.4006	overlapped	<100kb	NA	Included
Corvus_brachyrhynchos_[refseq_GCF_5F000691975.1_2014-06-02]	Corvus_brachyrhynchos	Aves	0.3894	overlapped	<100kb	NA	Included
Corvus_cornix_cornix_[refseq_GCF_5F000738735.5_2021-02-04]	Corvus_cornix_cornix	Aves	0.409	overlapped	<100kb	NA	Included
Corvus_hawaiiensis_[genbank_GCA_5F020740725.1_2021-11-04]	Corvus_hawaiiensis	Aves	0.3894	overlapped	<100kb	NA	Included
Corvus_kubaryi_[refseq_GCF_5F017639235.1_2021-03-30]	Corvus_kubaryi	Aves	0.409	overlapped	<100kb	NA	Included
Corvus_macrorhynchos_[genbank_GCA_5F014363025.1_2020-08-22]	Corvus_macrorhynchos	Aves	0.3894	overlapped	<100kb	NA	Included
Corvus_moneduloides_[refseq_GCF_5F009650955.1_2019-11-14]	Corvus_moneduloides	Aves	0.409	overlapped	<100kb	NA	Included
Corythaeola_cristata_[genbank_GCA_5F013396815.1_2020-07-10]	Corythaeola_cristata	Aves	0.7455	overlapped	<100kb	not detected	Included
Corythaixoides_concolor_[genbank_GCA_5F013399495.1_2020-07-10]	Corythaixoides_concolor	Aves	0.635	overlapped	<100kb	not detected	Included
Coturnix_japonica_[refseq_GCF_5F001577835.2_2016-03-01]	Coturnix_japonica	Aves	0.4602	overlapped	<100kb	NA	Included
Crocodylus_porosus_[refseq_GCF_5F001723895.1_2016-09-13]	Crocodylus_porosus	Crocodilia	0.9974	overlapped	<100kb	detected	Included
Crossoptilon_mantchuricum_[genbank_GCA_5F019593555.1_2021-08-13]	Crossoptilon_mantchuricum	Aves	0.4627	overlapped	<100kb	NA	Included
Crotalus_adamanteus_[genbank_GCA_5F018446365.1_2021-05-25]	Crotalus_adamanteus	Squamata	0.7171	overlapped	diffrent_scaffold	not detected	Included
Crotalus_horridus_[genbank_GCA_5F001625485.1_2016-04-21]	Crotalus_horridus	Squamata	0.3501	not overlapped	diffrent_scaffold	NA	Included
Crotalus_pyrrhus_[genbank_GCA_5F000737285.1_2014-08-01]	Crotalus_pyrrhus	Squamata	0.3894	overlapped	diffrent_scaffold	NA	Included
Crotalus_tigris_[refseq_GCF_5F016545835.1_2021-01-06]	Crotalus_tigris	Squamata	0.5347	overlapped	<100kb	not detected	Included
Crotalus_viridis_viridis_[genbank_GCA_5F003400415.2_2019-01-08]	Crotalus_viridis_viridis	Squamata	0.7171	overlapped	<100kb	not detected	Included
Crotophaga_sulcirostris_[genbank_GCA_5F013397455.1_2020-07-10]	Crotophaga_sulcirostris	Aves	0.3894	overlapped	diffrent_scaffold	NA	not included
Crypturellus_cinnamomeus_[genbank_GCA_5F003342915.1_2018-07-26]	Crypturellus_cinnamomeus	Aves	0.9923	overlapped	<100kb	detected	not included
Crypturellus_soui_[genbank_GCA_5F013389845.1_2020-07-06]	Crypturellus_soui	Aves	0.6272	not overlapped	diffrent_scaffold	NA	not included
Crypturellus_undulatus_[genbank_GCA_5F013389825.1_2020-07-06]	Crypturellus_undulatus	Aves	0.9923	overlapped	<100kb	detected	not included
Cuculus_canorus_[refseq_GCF_5F000709325.1_2014-06-17]	Cuculus_canorus	Aves	0.3894	overlapped	diffrent_scaffold	NA	Included
Cuora_amboinensis_[genbank_GCA_5F004028625.2_2019-03-22]	Cuora_amboinensis	Testudines	1	overlapped	<100kb	detected	Included
Cuora_mccordi_[genbank_GCA_5F003846335.1_2018-11-28]	Cuora_mccordi	Testudines	1	overlapped	<100kb	detected	Included
Cyanistes_caeruleus_[refseq_GCF_5F002901205.1_2018-01-26]	Cyanistes_caeruleus	Aves	0.3894	overlapped	<100kb	NA	Included
Cyanoderma_ruficeps_[genbank_GCA_5F008694505.1_2019-09-25]	Cyanoderma_ruficeps	Aves	0.3894	overlapped	<100kb	NA	Included
Cygnus_atratus_[refseq_GCF_5F013377495.1_2020-06-30]	Cygnus_atratus	Aves	0.4807	overlapped	<100kb	NA	Included
Cygnus_buccinator_[genbank_GCA_5F019232035.1_2021-07-15]	Cygnus_buccinator	Aves	0.5167	overlapped	<100kb	not detected	not included
Cygnus_cygnus_[genbank_GCA_5F014362685.1_2020-08-22]	Cygnus_cygnus	Aves	0.5167	overlapped	diffrent_scaffold	not detected	Included
Cygnus_olor_[refseq_GCF_5F009769625.2_2021-03-31]	Cygnus_olor	Aves	0.5167	overlapped	<100kb	not detected	Included
Daphoenositta_chrysoptera_[genbank_GCA_5F013397915.1_2020-07-10]	Daphoenositta_chrysoptera	Aves	0.395	overlapped	<100kb	NA	Included
Dasyornis_broadbenti_[genbank_GCA_5F013397935.1_2020-07-10]	Dasyornis_broadbenti	Aves	0.3894	overlapped	<100kb	NA	Included
Dendrocopos_noguchii_[genbank_GCA_5F004320165.1_2019-02-16]	Dendrocopos_noguchii	Aves	0.4473	overlapped	<100kb	NA	Included
Dermatemys_mawii_[genbank_GCA_5F007922305.1_2019-08-05]	Dermatemys_mawii	Testudines	0.9871	overlapped	<100kb	detected	Included
Dermochelys_coriacea_[refseq_GCF_5F009764565.3_2021-08-25]	Dermochelys_coriacea	Testudines	1	overlapped	<100kb	detected	Included
Dicaeum_eximium_[genbank_GCA_5F013396995.1_2020-07-10]	Dicaeum_eximium	Aves	0.409	overlapped	<100kb	NA	Included
Dicrurus_megarhynchus_[genbank_GCA_5F013399195.1_2020-07-10]	Dicrurus_megarhynchus	Aves	0.3894	overlapped	<100kb	NA	Included
Diglossa_brunneiventris_[genbank_GCA_5F019023105.1_2021-06-24]	Diglossa_brunneiventris	Aves	0.3894	overlapped	<100kb	NA	Included
Diphyllodes_magnificus_[genbank_GCA_5F003713285.1_2018-11-06]	Diphyllodes_magnificus	Aves	0.3894	overlapped	<100kb	NA	Included
Donacobius_atricapilla_[genbank_GCA_5F013397315.1_2020-07-10]	Donacobius_atricapilla	Aves	0.3894	overlapped	<100kb	NA	Included
Dromaius_novaehollandiae_[refseq_GCF_5F003342905.1_2018-07-26]	Dromaius_novaehollandiae	Aves	1	overlapped	<100kb	detected	Included
Dromas_ardeola_[genbank_GCA_5F013398915.1_2020-07-10]	Dromas_ardeola	Aves	0.7892	overlapped	<100kb	not detected	Included
Drymodes_brunneopygia_[genbank_GCA_5F013400955.1_2020-07-10]	Drymodes_brunneopygia	Aves	0.3894	overlapped	<100kb	NA	Included
Dryobates_pubescens_[refseq_GCF_5F000699005.1_2014-06-06]	Dryobates_pubescens	Aves	0.4216	overlapped	<100kb	NA	Included
Dryoscopus_gambensis_[genbank_GCA_5F013389985.1_2020-07-06]	Dryoscopus_gambensis	Aves	0.3894	overlapped	<100kb	NA	Included
Eclectus_roratus_[genbank_GCA_5F011763535.1_2020-03-27]	Eclectus_roratus	Aves	0.4422	overlapped	>100kb	NA	Included
Edolisoma_coerulescens_[genbank_GCA_5F013397115.1_2020-07-10]	Edolisoma_coerulescens	Aves	0.409	overlapped	<100kb	NA	not included
Egretta_garzetta_[refseq_GCF_5F000687185.1_2014-05-09]	Egretta_garzetta	Aves	0.6889	overlapped	<100kb	not detected	Included
Elachura_formosa_[genbank_GCA_5F013398795.1_2020-07-10]	Elachura_formosa	Aves	0.3894	overlapped	<100kb	NA	Included
Emberiza_fucata_[genbank_GCA_5F013398835.1_2020-07-10]	Emberiza_fucata	Aves	0.3894	overlapped	<100kb	NA	Included
Empidonax_traillii_[refseq_GCF_5F003031625.1_2018-04-03]	Empidonax_traillii	Aves	0.3894	overlapped	<100kb	NA	Included
Emydocephalus_ijimae_[genbank_GCA_5F004319985.1_2019-01-09]	Emydocephalus_ijimae	Squamata	0.5347	overlapped	diffrent_scaffold	not detected	Included
Emydura_subglobosa_[genbank_GCA_5F007922225.1_2019-08-05]	Emydura_subglobosa	Testudines	0.9846	overlapped	<100kb	detected	Included
Entomyzon_cyanotis_[genbank_GCA_5F020137895.1_2021-09-24]	Entomyzon_cyanotis	Aves	0.3894	overlapped	<100kb	NA	Included
Eolophus_roseicapilla_[genbank_GCA_5F013397615.1_2020-07-10]	Eolophus_roseicapilla	Aves	0.4499	overlapped	<100kb	NA	Included
Eopsaltria_australis_[genbank_GCA_5F003426825.1_2018-08-23]	Eopsaltria_australis	Aves	0.3894	overlapped	<100kb	NA	Included
Eremophila_alpestris_peregrina_[genbank_GCA_5F009792885.1_2019-12-23]	Eremophila_alpestris_peregrina	Aves	0.409	overlapped	<100kb	NA	Included
Erithacus_rubecula_[genbank_GCA_5F903797595.2_2021-05-03]	Erithacus_rubecula	Aves	0.3894	overlapped	<100kb	NA	Included
Erpornis_zantholeuca_[genbank_GCA_5F013400515.1_2020-07-10]	Erpornis_zantholeuca	Aves	0.3894	overlapped	<100kb	NA	Included
Erythrocercus_mccallii_[genbank_GCA_5F013397435.1_2020-07-10]	Erythrocercus_mccallii	Aves	0.3894	overlapped	diffrent_scaffold	NA	not included
Eubucco_bourcierii_[genbank_GCA_5F013396675.1_2020-07-10]	Eubucco_bourcierii	Aves	0.4422	overlapped	<100kb	NA	not included
Eudromia_elegans_[genbank_GCA_5F003342815.1_2018-07-26]	Eudromia_elegans	Aves	1	overlapped	<100kb	detected	Included
Eudyptes_chrysocome_[genbank_GCA_5F010085355.1_2020-01-31]	Eudyptes_chrysocome	Aves	0.6735	overlapped	<100kb	not detected	not included
Eudyptes_chrysolophus_[genbank_GCA_5F010084205.1_2020-01-31]	Eudyptes_chrysolophus	Aves	0.7712	overlapped	<100kb	not detected	Included
Eudyptes_filholi_[genbank_GCA_5F010085365.1_2020-01-31]	Eudyptes_filholi	Aves	0.7635	overlapped	<100kb	not detected	Included
Eudyptes_moseleyi_[genbank_GCA_5F010082375.1_2020-01-31]	Eudyptes_moseleyi	Aves	0.7712	overlapped	<100kb	not detected	not included
Eudyptes_pachyrhynchus_[genbank_GCA_5F010085335.1_2020-01-31]	Eudyptes_pachyrhynchus	Aves	0.7044	overlapped	<100kb	not detected	Included
Eudyptes_robustus_[genbank_GCA_5F010085315.1_2020-01-31]	Eudyptes_robustus	Aves	0.6735	overlapped	<100kb	not detected	Included
Eudyptes_schlegeli_[genbank_GCA_5F010080425.1_2020-01-31]	Eudyptes_schlegeli	Aves	0.6735	overlapped	<100kb	not detected	Included
Eudyptes_sclateri_[genbank_GCA_5F010078445.1_2020-01-31]	Eudyptes_sclateri	Aves	0.6735	overlapped	<100kb	not detected	Included
Eudyptula_albosignata_[genbank_GCA_5F010080465.1_2020-01-31]	Eudyptula_albosignata	Aves	0.5835	overlapped	<100kb	not detected	Included
Eudyptula_minor_[genbank_GCA_5F010080355.1_2020-01-31]	Eudyptula_minor	Aves	0.5835	overlapped	<100kb	not detected	Included
Eudyptula_novaehollandiae_[genbank_GCA_5F010078495.1_2020-01-31]	Eudyptula_novaehollandiae	Aves	0.4036	overlapped	<100kb	NA	not included
Eulacestoma_nigropectus_[genbank_GCA_5F013397775.1_2020-07-10]	Eulacestoma_nigropectus	Aves	0.3894	overlapped	diffrent_scaffold	NA	Included
Eupsittula_pertinax_[genbank_GCA_5F011317185.1_2020-03-16]	Eupsittula_pertinax	Aves	0.437	overlapped	diffrent_scaffold	NA	Included
Eurypyga_helias_[refseq_GCF_5F000690775.1_2014-05-13]	Eurypyga_helias	Aves	0.3697	overlapped	diffrent_scaffold	NA	Included
Eurystomus_gularis_[genbank_GCA_5F013400335.1_2020-07-10]	Eurystomus_gularis	Aves	0.7249	overlapped	<100kb	not detected	Included
Falco_cherrug_[refseq_GCF_5F000337975.1_2013-02-05]	Falco_cherrug	Aves	0.6144	overlapped	<100kb	not detected	Included
Falco_naumanni_[refseq_GCF_5F017639655.2_2021-03-30]	Falco_naumanni	Aves	0.5964	overlapped	<100kb	not detected	Included
Falco_peregrinus_[refseq_GCF_5F000337955.1_2013-02-05]	Falco_peregrinus	Aves	0.6915	overlapped	<100kb	not detected	Included
Falco_rusticolus_[refseq_GCF_5F015220075.1_2020-11-03]	Falco_rusticolus	Aves	0.6915	overlapped	<100kb	not detected	Included
Falco_tinnunculus_[genbank_GCA_5F010332995.1_2020-02-04]	Falco_tinnunculus	Aves	0.6144	overlapped	<100kb	not detected	Included
Falcunculus_frontatus_[genbank_GCA_5F013398115.1_2020-07-10]	Falcunculus_frontatus	Aves	0.3894	overlapped	<100kb	NA	Included
Ficedula_albicollis_[refseq_GCF_5F000247815.1_2013-06-27]	Ficedula_albicollis	Aves	0.4034	overlapped	<100kb	NA	Included
Formicarius_rufipectus_[genbank_GCA_5F013399695.1_2020-07-10]	Formicarius_rufipectus	Aves	0.3894	overlapped	<100kb	NA	Included
Fratercula_arctica_[genbank_GCA_5F905066775.2_2021-07-28]	Fratercula_arctica	Aves	0.6992	overlapped	<100kb	not detected	Included
Fratercula_cirrhata_[genbank_GCA_5F014363165.1_2020-08-22]	Fratercula_cirrhata	Aves	0.6992	overlapped	<100kb	not detected	Included
Fregata_magnificens_[genbank_GCA_5F013389945.1_2020-07-06]	Fregata_magnificens	Aves	0.8715	overlapped	diffrent_scaffold	not detected	Included
Fregetta_grallaria_[genbank_GCA_5F013399335.1_2020-07-10]	Fregetta_grallaria	Aves	0.7172	overlapped	<100kb	not detected	not included
Fringilla_coelebs_coelebs_[genbank_GCA_5F015532645.2_2021-06-16]	Fringilla_coelebs_coelebs	Aves	0.3894	overlapped	<100kb	NA	Included
Fulica_atra_[genbank_GCA_5F013372525.1_2020-06-24]	Fulica_atra	Aves	0.4499	overlapped	<100kb	NA	Included
Fulmarus_glacialis_[refseq_GCF_5F000690835.1_2014-05-13]	Fulmarus_glacialis	Aves	0.7404	overlapped	diffrent_scaffold	not detected	Included
Furnarius_figulus_[genbank_GCA_5F013397465.1_2020-07-10]	Furnarius_figulus	Aves	0.3894	overlapped	<100kb	NA	Included
Galbula_dea_[genbank_GCA_5F013399015.1_2020-07-10]	Galbula_dea	Aves	0.4602	overlapped	<100kb	NA	Included
Gallirallus_okinawae_[genbank_GCA_5F002003005.1_2017-02-09]	Gallirallus_okinawae	Aves	0.4627	overlapped	diffrent_scaffold	NA	not included
Gallus_gallus_[refseq_GCF_5F016699485.2_2021-01-19]	Gallus_gallus	Aves	0.5501	overlapped	<100kb	not detected	Included
Gavia_stellata_[refseq_GCF_5F000690875.1_2014-05-13]	Gavia_stellata	Aves	0.3894	overlapped	diffrent_scaffold	NA	Included
Gavialis_gangeticus_[refseq_GCF_5F001723915.1_2016-09-13]	Gavialis_gangeticus	Crocodilia	0.9974	overlapped	<100kb	detected	Included
Gekko_japonicus_[refseq_GCF_5F001447785.1_2015-11-25]	Gekko_japonicus	Squamata	0.8739	overlapped	<100kb	detected	Included
Geococcyx_californianus_[genbank_GCA_5F013389885.1_2020-07-06]	Geococcyx_californianus	Aves	0.3725	overlapped	diffrent_scaffold	NA	not included
Geospiza_fortis_[refseq_GCF_5F000277835.1_2012-07-25]	Geospiza_fortis	Aves	0.3922	overlapped	<100kb	NA	Included
Geothlypis_trichas_[genbank_GCA_5F009764595.1_2019-12-19]	Geothlypis_trichas	Aves	0.3894	overlapped	<100kb	NA	Included
Glareola_pratincola_[genbank_GCA_5F013401295.1_2020-07-10]	Glareola_pratincola	Aves	0.4679	overlapped	<100kb	NA	Included
Glaucidium_brasilianum_[genbank_GCA_5F013399595.1_2020-07-10]	Glaucidium_brasilianum	Aves	0.5733	overlapped	<100kb	not detected	not included
Gopherus_agassizii_[genbank_GCA_5F002896415.1_2018-01-24]	Gopherus_agassizii	Testudines	1	overlapped	<100kb	detected	Included
Gopherus_evgoodei_[refseq_GCF_5F007399415.2_2019-07-25]	Gopherus_evgoodei	Testudines	1	overlapped	<100kb	detected	not included
Gorsachius_goisagi_[genbank_GCA_5F018403395.1_2021-03-31]	Gorsachius_goisagi	Aves	0.3697	overlapped	<100kb	NA	not included
Grallaria_varia_[genbank_GCA_5F013396735.1_2020-07-10]	Grallaria_varia	Aves	0.3894	overlapped	<100kb	NA	Included
Grantiella_picta_[genbank_GCA_5F013397955.1_2020-07-10]	Grantiella_picta	Aves	0.4034	overlapped	<100kb	NA	Included
Grus_americana_[genbank_GCA_5F013390085.1_2020-07-06]	Grus_americana	Aves	0.8509	overlapped	diffrent_scaffold	not detected	Included
Grus_japonensis_[genbank_GCA_5F002002985.1_2017-02-10]	Grus_japonensis	Aves	0.671	overlapped	diffrent_scaffold	not detected	Included
Grus_monacha_[genbank_GCA_5F012487855.1_2020-04-08]	Grus_monacha	Aves	0.581	overlapped	<100kb	not detected	Included
Grus_nigricollis_[genbank_GCA_5F004360235.1_2019-03-22]	Grus_nigricollis	Aves	0.7249	overlapped	<100kb	not detected	Included
Guaruba_guarouba_[genbank_GCA_5F011800095.1_2020-03-31]	Guaruba_guarouba	Aves	0.437	overlapped	<100kb	NA	Included
Gymnogyps_californianus_[genbank_GCA_5F018139145.1_2021-04-25]	Gymnogyps_californianus	Aves	0.892	overlapped	<100kb	not detected	Included
Gymnorhina_tibicen_[genbank_GCA_5F013399875.1_2020-07-10]	Gymnorhina_tibicen	Aves	0.3894	overlapped	<100kb	NA	Included
Halcyon_senegalensis_[genbank_GCA_5F013397595.1_2020-07-10]	Halcyon_senegalensis	Aves	0.527	overlapped	<100kb	not detected	Included
Haliaeetus_albicilla_[refseq_GCF_5F000691405.1_2014-05-15]	Haliaeetus_albicilla	Aves	0.8843	overlapped	diffrent_scaffold	not detected	Included
Haliaeetus_leucocephalus_[refseq_GCF_5F000737465.1_2014-08-04]	Haliaeetus_leucocephalus	Aves	0.7815	overlapped	<100kb	not detected	Included
Haliaeetus_pelagicus_[genbank_GCA_5F014363185.1_2020-08-22]	Haliaeetus_pelagicus	Aves	0.8869	overlapped	<100kb	not detected	not included
Heliornis_fulica_[genbank_GCA_5F013399135.1_2020-07-10]	Heliornis_fulica	Aves	0.5398	overlapped	<100kb	not detected	Included
Hemignathus_wilsoni_[genbank_GCA_5F009690805.1_2019-11-22]	Hemignathus_wilsoni	Aves	0.3894	overlapped	<100kb	NA	Included
Hemiprocne_comata_[genbank_GCA_5F020745705.1_2021-11-05]	Hemiprocne_comata	Aves	0.395	overlapped	<100kb	NA	Included
Herpetotheres_cachinnans_[genbank_GCA_5F013399355.1_2020-07-10]	Herpetotheres_cachinnans	Aves	0.8046	overlapped	<100kb	not detected	Included
Heteronetta_atricapilla_[genbank_GCA_5F011075105.1_2020-03-10]	Heteronetta_atricapilla	Aves	0.509	not overlapped	<100kb	NA	not included
Himantopus_himantopus_[genbank_GCA_5F013400095.1_2020-07-10]	Himantopus_himantopus	Aves	0.8406	overlapped	<100kb	not detected	not included
Himantopus_leucocephalus_[genbank_GCA_5F003993805.1_2019-01-04]	Himantopus_leucocephalus	Aves	0.7326	overlapped	<100kb	not detected	Included
Hippolais_icterina_[genbank_GCA_5F013400075.1_2020-07-10]	Hippolais_icterina	Aves	0.3894	overlapped	<100kb	NA	Included
Hirundo_rustica_[genbank_GCA_5F015227805.3_2021-11-30]	Hirundo_rustica	Aves	0.3894	overlapped	<100kb	NA	not included
Hirundo_rustica_rustica_[genbank_GCA_5F003692655.1_2018-10-29]	Hirundo_rustica_rustica	Aves	0.3894	overlapped	<100kb	NA	Included
Horornis_vulcanius_[genbank_GCA_5F013401035.1_2020-07-10]	Horornis_vulcanius	Aves	0.3641	overlapped	diffrent_scaffold	NA	not included
Hydrophis_curtus_[genbank_GCA_5F019472885.1_2021-08-09]	Hydrophis_curtus	Squamata	0.5476	overlapped	<100kb	not detected	Included
Hydrophis_cyanocinctus_[genbank_GCA_5F019473425.1_2021-08-09]	Hydrophis_cyanocinctus	Squamata	0.5476	overlapped	<100kb	not detected	Included
Hydrophis_hardwickii_[genbank_GCA_5F004023765.1_2019-01-15]	Hydrophis_hardwickii	Squamata	0.5476	overlapped	diffrent_scaffold	not detected	Included
Hydrophis_melanocephalus_[genbank_GCA_5F004320005.1_2019-02-13]	Hydrophis_melanocephalus	Squamata	0.4846	overlapped	diffrent_scaffold	NA	Included
Hylia_prasina_[genbank_GCA_5F013397195.1_2020-07-10]	Hylia_prasina	Aves	0.3894	overlapped	<100kb	NA	Included
Hypocryptadius_cinnamomeus_[genbank_GCA_5F013400635.1_2020-07-10]	Hypocryptadius_cinnamomeus	Aves	0.3985	overlapped	<100kb	NA	Included
Ibidorhyncha_struthersii_[genbank_GCA_5F013398815.1_2020-07-10]	Ibidorhyncha_struthersii	Aves	0.7609	overlapped	<100kb	not detected	Included
Ifrita_kowaldi_[genbank_GCA_5F013398055.1_2020-07-10]	Ifrita_kowaldi	Aves	0.3894	overlapped	<100kb	NA	Included
Illadopsis_cleaveri_[genbank_GCA_5F013399915.1_2020-07-10]	Illadopsis_cleaveri	Aves	0.3894	overlapped	<100kb	NA	Included
Indicator_maculatus_[genbank_GCA_5F013399975.1_2020-07-10]	Indicator_maculatus	Aves	0.4704	overlapped	<100kb	NA	Included
Irena_cyanogastra_[genbank_GCA_5F013397155.1_2020-07-10]	Irena_cyanogastra	Aves	0.4062	overlapped	<100kb	NA	Included
Jacana_jacana_[genbank_GCA_5F013400555.1_2020-07-10]	Jacana_jacana	Aves	0.3894	overlapped	diffrent_scaffold	NA	Included
Junco_hyemalis_[genbank_GCA_5F003829775.1_2018-11-26]	Junco_hyemalis	Aves	0.3894	overlapped	<100kb	NA	Included
Lacerta_agilis_[refseq_GCF_5F009819535.1_2019-12-31]	Lacerta_agilis	Squamata	1	overlapped	<100kb	detected	Included
Lacerta_bilineata_[genbank_GCA_5F900245895.1_2018-04-26]	Lacerta_bilineata	Squamata	1	overlapped	<100kb	detected	Included
Lacerta_viridis_[genbank_GCA_5F900245905.1_2018-04-26]	Lacerta_viridis	Squamata	1	overlapped	<100kb	detected	Included
Lagopus_leucura_[refseq_GCF_5F019238085.1_2021-07-15]	Lagopus_leucura	Aves	0.4139	overlapped	<100kb	NA	Included
Lagopus_muta_japonica_[genbank_GCA_5F004320205.1_2019-02-15]	Lagopus_muta_japonica	Aves	0.5193	overlapped	diffrent_scaffold	not detected	Included
Lamprotornis_superbus_[genbank_GCA_5F015883425.1_2020-12-09]	Lamprotornis_superbus	Aves	0.3894	overlapped	<100kb	NA	not included
Lanius_collurio_[genbank_GCA_5F020086605.1_2021-09-21]	Lanius_collurio	Aves	0.3894	overlapped	<100kb	NA	Included
Lanius_ludovicianus_[genbank_GCA_5F013397235.1_2020-07-10]	Lanius_ludovicianus	Aves	0.3894	overlapped	<100kb	NA	Included
Larus_smithsonianus_[genbank_GCA_5F013400295.1_2020-07-10]	Larus_smithsonianus	Aves	0.3221	overlapped	diffrent_scaffold	NA	Included
Laticauda_colubrina_[genbank_GCA_5F015471245.1_2020-11-04]	Laticauda_colubrina	Squamata	0.5574	overlapped	<100kb	not detected	Included
Laticauda_laticaudata_[genbank_GCA_5F004320025.1_2019-01-09]	Laticauda_laticaudata	Squamata	0.4961	overlapped	diffrent_scaffold	NA	Included
Leiothrix_lutea_[genbank_GCA_5F013400445.1_2020-07-10]	Leiothrix_lutea	Aves	0.3894	overlapped	<100kb	NA	Included
Lepidothrix_coronata_[refseq_GCF_5F001604755.1_2016-03-31]	Lepidothrix_coronata	Aves	0.3907	overlapped	<100kb	NA	Included
Leptocoma_aspasia_[genbank_GCA_5F013399835.1_2020-07-10]	Leptocoma_aspasia	Aves	0.3985	overlapped	<100kb	NA	not included
Leptosomus_discolor_[refseq_GCF_5F000691785.1_2014-05-23]	Leptosomus_discolor	Aves	0.6041	overlapped	diffrent_scaffold	not detected	Included
Leucopsar_rothschildi_[genbank_GCA_5F014363365.1_2020-08-22]	Leucopsar_rothschildi	Aves	0.3894	overlapped	<100kb	NA	Included
Lichenostomus_cassidix_[genbank_GCA_5F008360975.1_2019-09-09]	Lichenostomus_cassidix	Aves	0.401	overlapped	<100kb	NA	not included
Limosa_lapponica_baueri_[genbank_GCA_5F002844005.1_2017-12-15]	Limosa_lapponica_baueri	Aves	0.5347	overlapped	diffrent_scaffold	not detected	Included
Locustella_ochotensis_[genbank_GCA_5F013400155.1_2020-07-10]	Locustella_ochotensis	Aves	0.3894	overlapped	<100kb	NA	Included
Lonchura_striata_domestica_[refseq_GCF_5F005870125.1_2019-06-05]	Lonchura_striata_domestica	Aves	0.395	overlapped	<100kb	NA	Included
Lophochroa_leadbeateri_[genbank_GCA_5F010015045.1_2020-01-30]	Lophochroa_leadbeateri	Aves	0.4499	overlapped	>100kb	NA	Included
Lophotis_ruficrista_[genbank_GCA_5F013396455.1_2020-07-10]	Lophotis_ruficrista	Aves	0.3697	overlapped	diffrent_scaffold	NA	not included
Lophura_nycthemera_[genbank_GCA_5F021292215.1_2021-12-27]	Lophura_nycthemera	Aves	0.5784	overlapped	<100kb	not detected	Included
Lorius_garrulus_[genbank_GCA_5F010014925.1_2020-01-30]	Lorius_garrulus	Aves	0.5167	overlapped	diffrent_scaffold	not detected	Included
Loxia_curvirostra_[genbank_GCA_5F013398455.1_2020-07-10]	Loxia_curvirostra	Aves	0.3894	overlapped	<100kb	NA	Included
Loxia_leucoptera_[genbank_GCA_5F013396895.1_2020-07-10]	Loxia_leucoptera	Aves	0.3894	overlapped	<100kb	NA	Included
Lycocorax_pyrrhopterus_obiensis_[genbank_GCA_5F014706295.1_2020-09-23]	Lycocorax_pyrrhopterus_obiensis	Aves	0.3894	overlapped	<100kb	NA	Included
Lyrurus_tetrix_tetrix_[genbank_GCA_5F000586395.1_2014-03-08]	Lyrurus_tetrix_tetrix	Aves	0.1569	overlapped	diffrent_scaffold	NA	Included
Machaerirhynchus_nigripectus_[genbank_GCA_5F013397975.1_2020-07-10]	Machaerirhynchus_nigripectus	Aves	0.3894	overlapped	<100kb	NA	Included
Malaclemys_terrapin_terrapin_[genbank_GCA_5F001728815.2_2016-09-20]	Malaclemys_terrapin_terrapin	Testudines	1	overlapped	<100kb	detected	Included
Malurus_cyaneus_samueli_[genbank_GCA_5F009741485.1_2019-12-12]	Malurus_cyaneus_samueli	Aves	0.3894	overlapped	<100kb	NA	Included
Malurus_elegans_[genbank_GCA_5F013397995.1_2020-07-10]	Malurus_elegans	Aves	0.3894	overlapped	<100kb	NA	Included
Manacus_vitellinus_[refseq_GCF_5F001715985.3_2019-07-03]	Manacus_vitellinus	Aves	0.3894	overlapped	<100kb	NA	Included
Mauremys_mutica_[refseq_GCF_5F020497125.1_2021-10-14]	Mauremys_mutica	Testudines	1	overlapped	<100kb	detected	Included
Mauremys_reevesii_[refseq_GCF_5F016161935.1_2020-12-22]	Mauremys_reevesii	Testudines	1	overlapped	<100kb	detected	Included
Megadyptes_antipodes_antipodes_[genbank_GCA_5F010078485.1_2020-01-31]	Megadyptes_antipodes_antipodes	Aves	0.7609	overlapped	<100kb	not detected	Included
Melanerpes_aurifrons_[genbank_GCA_5F011125475.1_2020-03-17]	Melanerpes_aurifrons	Aves	0.6298	overlapped	<100kb	not detected	Included
Melanocharis_versteri_[genbank_GCA_5F013397845.1_2020-07-10]	Melanocharis_versteri	Aves	0.3894	overlapped	<100kb	NA	Included
Meleagris_gallopavo_[refseq_GCF_5F000146605.3_2019-10-21]	Meleagris_gallopavo	Aves	0.4139	overlapped	<100kb	NA	Included
Melopsittacus_undulatus_[refseq_GCF_5F012275295.1_2020-04-13]	Melopsittacus_undulatus	Aves	0.4499	overlapped	<100kb	NA	Included
Melospiza_melodia_[genbank_GCA_5F013398205.1_2020-07-10]	Melospiza_melodia	Aves	0.3933	overlapped	<100kb	NA	not included
Melospiza_melodia_maxima_[genbank_GCA_5F011057915.1_2020-03-02]	Melospiza_melodia_maxima	Aves	0.3894	overlapped	<100kb	NA	Included
Menura_novaehollandiae_[genbank_GCA_5F013396355.1_2020-07-10]	Menura_novaehollandiae	Aves	0.3894	overlapped	<100kb	NA	Included
Merops_nubicus_[refseq_GCF_5F000691845.1_2014-05-16]	Merops_nubicus	Aves	0.4396	overlapped	diffrent_scaffold	NA	Included
Mesembrinibis_cayennensis_[genbank_GCA_5F013399675.1_2020-07-10]	Mesembrinibis_cayennensis	Aves	0.7506	overlapped	<100kb	not detected	not included
Mesitornis_unicolor_[refseq_GCF_5F000695765.1_2014-06-02]	Mesitornis_unicolor	Aves	0.7018	overlapped	diffrent_scaffold	not detected	Included
Mesoclemmys_tuberculata_[genbank_GCA_5F007922155.1_2019-08-05]	Mesoclemmys_tuberculata	Testudines	0.9846	overlapped	<100kb	detected	not included
Mionectes_macconnelli_[genbank_GCA_5F013397495.1_2020-07-10]	Mionectes_macconnelli	Aves	0.3894	overlapped	<100kb	NA	Included
Mixornis_gularis_[genbank_GCA_5F003546035.1_2018-09-11]	Mixornis_gularis	Aves	0.3866	overlapped	<100kb	NA	Included
Mohoua_ochrocephala_[genbank_GCA_5F013398855.1_2020-07-10]	Mohoua_ochrocephala	Aves	0.395	overlapped	<100kb	NA	Included
Molothrus_ater_[refseq_GCF_5F012460135.1_2020-04-20]	Molothrus_ater	Aves	0.3894	overlapped	<100kb	NA	Included
Montifringilla_adamsi_[genbank_GCA_5F017590115.1_2021-03-26]	Montifringilla_adamsi	Aves	0.3894	overlapped	<100kb	NA	Included
Motacilla_alba_[genbank_GCA_5F013397355.1_2020-07-10]	Motacilla_alba	Aves	0.3894	overlapped	<100kb	NA	not included
Motacilla_alba_alba_[refseq_GCF_5F015832195.1_2020-12-08]	Motacilla_alba_alba	Aves	0.401	overlapped	<100kb	NA	Included
Motacilla_tschutschensis_[genbank_GCA_5F018904545.1_2021-06-16]	Motacilla_tschutschensis	Aves	0.3894	overlapped	diffrent_scaffold	NA	not included
Myanophis_thanlyinensis_[genbank_GCA_5F017656035.1_2021-04-01]	Myanophis_thanlyinensis	Squamata	0.4594	overlapped	diffrent_scaffold	NA	Included
Myiagra_hebetior_[genbank_GCA_5F013397015.1_2020-07-10]	Myiagra_hebetior	Aves	0.3894	overlapped	<100kb	NA	Included
Myiopsitta_monachus_[genbank_GCA_5F017639245.1_2021-03-30]	Myiopsitta_monachus	Aves	0.4499	overlapped	<100kb	NA	Included
Mystacornis_crossleyi_[genbank_GCA_5F013400655.1_2020-07-10]	Mystacornis_crossleyi	Aves	0.3641	overlapped	diffrent_scaffold	NA	Included
Naja_naja_[genbank_GCA_5F009733165.1_2019-12-11]	Naja_naja	Squamata	0.6134	overlapped	<100kb	not detected	Included
Neodrepanis_coruscans_[genbank_GCA_5F013400695.1_2020-07-10]	Neodrepanis_coruscans	Aves	0.3417	overlapped	diffrent_scaffold	NA	Included
Neopelma_chrysocephalum_[refseq_GCF_5F003984885.1_2018-12-28]	Neopelma_chrysocephalum	Aves	0.4036	overlapped	<100kb	NA	Included
Neopipo_cinnamomea_[genbank_GCA_5F013397415.1_2020-07-10]	Neopipo_cinnamomea	Aves	0.3894	overlapped	<100kb	NA	Included
Nesospiza_acunhae_[genbank_GCA_5F013398715.1_2020-07-10]	Nesospiza_acunhae	Aves	0.3894	overlapped	<100kb	NA	Included
Nestor_notabilis_[refseq_GCF_5F000696875.1_2014-06-05]	Nestor_notabilis	Aves	0.653	overlapped	diffrent_scaffold	not detected	Included
Nettapus_auritus_[genbank_GCA_5F011076525.1_2020-03-10]	Nettapus_auritus	Aves	0.5167	overlapped	<100kb	not detected	not included
Nicator_chloris_[genbank_GCA_5F013400495.1_2020-07-10]	Nicator_chloris	Aves	0.3894	overlapped	<100kb	NA	Included
Nipponia_nippon_[refseq_GCF_5F000708225.1_2014-06-16]	Nipponia_nippon	Aves	0.9075	overlapped	<100kb	not detected	Included
Nisaetus_nipalensis_[genbank_GCA_5F012487455.1_2020-04-08]	Nisaetus_nipalensis	Aves	0.7404	overlapped	diffrent_scaffold	not detected	Included
Notechis_scutatus_[refseq_GCF_5F900518725.1_2018-09-24]	Notechis_scutatus	Squamata	0.5347	overlapped	<100kb	not detected	Included
Nothocercus_julius_[genbank_GCA_5F013398735.1_2020-07-10]	Nothocercus_julius	Aves	1	overlapped	<100kb	detected	not included
Nothocercus_nigrocapillus_[genbank_GCA_5F013398345.1_2020-07-10]	Nothocercus_nigrocapillus	Aves	1	overlapped	<100kb	detected	not included
Nothoprocta_ornata_[genbank_GCA_5F013398335.1_2020-07-10]	Nothoprocta_ornata	Aves	0.9794	overlapped	<100kb	not detected	Included
Nothoprocta_pentlandii_[genbank_GCA_5F013398315.1_2020-07-10]	Nothoprocta_pentlandii	Aves	0.9794	overlapped	<100kb	not detected	not included
Nothoprocta_perdicaria_[refseq_GCF_5F003342845.1_2018-07-26]	Nothoprocta_perdicaria	Aves	0.9794	overlapped	<100kb	not detected	not included
Notiomystis_cincta_[genbank_GCA_5F013398075.1_2020-07-10]	Notiomystis_cincta	Aves	0.3894	overlapped	<100kb	NA	Included
Numida_meleagris_[refseq_GCF_5F002078875.1_2017-06-01]	Numida_meleagris	Aves	0.4884	overlapped	<100kb	NA	Included
Nyctibius_bracteatus_[genbank_GCA_5F013396595.1_2020-07-10]	Nyctibius_bracteatus	Aves	0.3894	overlapped	diffrent_scaffold	NA	Included
Nyctibius_grandis_[genbank_GCA_5F013368605.1_2020-06-23]	Nyctibius_grandis	Aves	0.3894	overlapped	<100kb	NA	Included
Nycticryphes_semicollaris_[genbank_GCA_5F013400055.1_2020-07-10]	Nycticryphes_semicollaris	Aves	0.6504	overlapped	<100kb	not detected	Included
Nyctiprogne_leucopyga_[genbank_GCA_5F013399395.1_2020-07-10]	Nyctiprogne_leucopyga	Aves	0.527	overlapped	diffrent_scaffold	not detected	not included
Nymphicus_hollandicus_[genbank_GCA_5F009823435.1_2019-12-31]	Nymphicus_hollandicus	Aves	0.4936	overlapped	diffrent_scaffold	NA	Included
Oceanites_oceanicus_[genbank_GCA_5F013396615.1_2020-07-10]	Oceanites_oceanicus	Aves	0.599	overlapped	<100kb	not detected	Included
Oceanodroma_tethys_[genbank_GCA_5F013397025.1_2020-07-10]	Oceanodroma_tethys	Aves	0.7995	overlapped	<100kb	not detected	not included
Odontophorus_gujanensis_[genbank_GCA_5F013399175.1_2020-07-10]	Odontophorus_gujanensis	Aves	0.3978	overlapped	<100kb	NA	Included
Oenanthe_oenanthe_[genbank_GCA_5F013399995.1_2020-07-10]	Oenanthe_oenanthe	Aves	0.3894	overlapped	<100kb	NA	Included
Onychorhynchus_coronatus_[genbank_GCA_5F013397825.1_2020-07-10]	Onychorhynchus_coronatus	Aves	0.3933	overlapped	<100kb	NA	Included
Onychostruthus_taczanowskii_[refseq_GCF_5F017590055.1_2021-03-26]	Onychostruthus_taczanowskii	Aves	0.3894	overlapped	<100kb	NA	Included
Ophiophagus_hannah_[genbank_GCA_5F000516915.1_2013-12-11]	Ophiophagus_hannah	Squamata	0.5347	overlapped	<100kb	not detected	Included
Opisthocomus_hoazin_[refseq_GCF_5F000692075.1_2014-05-19]	Opisthocomus_hoazin	Aves	0.6118	overlapped	<100kb	not detected	Included
Oreocharis_arfaki_[genbank_GCA_5F013398015.1_2020-07-10]	Oreocharis_arfaki	Aves	0.4034	overlapped	<100kb	NA	Included
Oreotrochilus_melanogaster_[genbank_GCA_5F013400995.1_2020-07-10]	Oreotrochilus_melanogaster	Aves	0.3894	overlapped	diffrent_scaffold	NA	Included
Origma_solitaria_[genbank_GCA_5F013397895.1_2020-07-10]	Origma_solitaria	Aves	0.3894	overlapped	<100kb	NA	Included
Oriolus_oriolus_[genbank_GCA_5F013400235.1_2020-07-10]	Oriolus_oriolus	Aves	0.3894	overlapped	<100kb	NA	Included
Orthonyx_spaldingii_[genbank_GCA_5F013397795.1_2020-07-10]	Orthonyx_spaldingii	Aves	0.3894	overlapped	<100kb	NA	not included
Otus_sunia_[genbank_GCA_5F010365825.1_2020-02-04]	Otus_sunia	Aves	0.6452	overlapped	>100kb	not detected	Included
Oxylabes_madagascariensis_[genbank_GCA_5F013400675.1_2020-07-10]	Oxylabes_madagascariensis	Aves	0.3641	overlapped	diffrent_scaffold	NA	not included
Oxyruncus_cristatus_[genbank_GCA_5F013399855.1_2020-07-10]	Oxyruncus_cristatus	Aves	0.3894	overlapped	<100kb	NA	Included
Oxyura_jamaicensis_[refseq_GCF_5F011077185.1_2020-03-10]	Oxyura_jamaicensis	Aves	0.7352	overlapped	<100kb	not detected	Included
Pachycephala_philippinensis_[genbank_GCA_5F013397055.1_2020-07-10]	Pachycephala_philippinensis	Aves	0.3894	overlapped	<100kb	NA	Included
Pachyramphus_minor_[genbank_GCA_5F013397135.1_2020-07-10]	Pachyramphus_minor	Aves	0.3894	overlapped	<100kb	NA	Included
Pandion_haliaetus_[genbank_GCA_5F013401275.1_2020-07-10]	Pandion_haliaetus	Aves	0.3894	overlapped	diffrent_scaffold	NA	Included
Pantherophis_guttatus_[refseq_GCF_5F001185365.1_2020-04-13]	Pantherophis_guttatus	Squamata	0.5574	overlapped	<100kb	not detected	Included
Pantherophis_obsoletus_[genbank_GCA_5F012654085.1_2020-04-22]	Pantherophis_obsoletus	Squamata	0.5064	overlapped	<100kb	not detected	Included
Panurus_biarmicus_[genbank_GCA_5F013398035.1_2020-07-10]	Panurus_biarmicus	Aves	0.3894	overlapped	<100kb	NA	Included
Paradisaea_raggiana_[genbank_GCA_5F003713265.1_2018-11-06]	Paradisaea_raggiana	Aves	0.3894	overlapped	<100kb	NA	Included
Paradisaea_rubra_[genbank_GCA_5F003713215.1_2018-11-06]	Paradisaea_rubra	Aves	0.3894	overlapped	<100kb	NA	Included
Pardalotus_punctatus_[genbank_GCA_5F013400915.1_2020-07-10]	Pardalotus_punctatus	Aves	0.3894	overlapped	<100kb	NA	Included
Paroedura_picta_[genbank_GCA_5F003118565.2_2021-09-14]	Paroedura_picta	Squamata	0.7927	overlapped	<100kb	detected	Included
Parotia_lawesii_[genbank_GCA_5F003713295.1_2018-11-06]	Parotia_lawesii	Aves	0.3894	overlapped	<100kb	NA	Included
Parus_major_[refseq_GCF_5F001522545.3_2019-01-15]	Parus_major	Aves	0.3894	overlapped	<100kb	NA	Included
Passer_domesticus_[genbank_GCA_5F001700915.1_2016-08-31]	Passer_domesticus	Aves	0.3894	overlapped	<100kb	NA	Included
Passer_montanus_[refseq_GCF_5F014805655.1_2020-09-30]	Passer_montanus	Aves	0.3894	overlapped	<100kb	NA	Included
Passerina_amoena_[genbank_GCA_5F013401095.1_2020-07-10]	Passerina_amoena	Aves	0.3894	overlapped	<100kb	NA	Included
Patagioenas_fasciata_monilis_[genbank_GCA_5F002029285.1_2017-03-15]	Patagioenas_fasciata_monilis	Aves	0.3894	overlapped	diffrent_scaffold	NA	Included
Pavo_cristatus_[genbank_GCA_5F005519975.1_2019-05-20]	Pavo_cristatus	Aves	0.5424	overlapped	<100kb	not detected	Included
Pavo_muticus_[genbank_GCA_5F016647715.1_2021-01-15]	Pavo_muticus	Aves	0.5424	overlapped	<100kb	not detected	Included
Pedionomus_torquatus_[genbank_GCA_5F013398155.1_2020-07-10]	Pedionomus_torquatus	Aves	0.545	overlapped	diffrent_scaffold	not detected	Included
Pelecanoides_urinatrix_[genbank_GCA_5F013400755.1_2020-07-10]	Pelecanoides_urinatrix	Aves	0.7506	overlapped	diffrent_scaffold	not detected	Included
Pelecanus_crispus_[refseq_GCF_5F000687375.1_2014-05-09]	Pelecanus_crispus	Aves	0.3894	overlapped	diffrent_scaffold	NA	Included
Pelodiscus_sinensis_[refseq_GCF_5F000230535.1_2012-07-24]	Pelodiscus_sinensis	Testudines	1	overlapped	<100kb	detected	Included
Pelusios_castaneus_[genbank_GCA_5F007922175.1_2019-08-01]	Pelusios_castaneus	Testudines	0.9871	overlapped	<100kb	detected	Included
Penelope_pileata_[genbank_GCA_5F013396635.1_2020-07-10]	Penelope_pileata	Aves	0.3866	overlapped	<100kb	NA	Included
Peucedramus_taeniatus_[genbank_GCA_5F013400575.1_2020-07-10]	Peucedramus_taeniatus	Aves	0.3894	overlapped	<100kb	NA	Included
Phaethon_lepturus_[refseq_GCF_5F000687285.1_2014-05-08]	Phaethon_lepturus	Aves	0.6427	overlapped	diffrent_scaffold	not detected	Included
Phaetusa_simplex_[genbank_GCA_5F013399535.1_2020-07-10]	Phaetusa_simplex	Aves	0.5501	overlapped	<100kb	not detected	Included
Phainopepla_nitens_[genbank_GCA_5F013400175.1_2020-07-10]	Phainopepla_nitens	Aves	0.3894	overlapped	<100kb	NA	Included
Phalacrocorax_auritus_[genbank_GCA_5F002173455.1_2017-06-06]	Phalacrocorax_auritus	Aves	0.527	overlapped	<100kb	not detected	not included
Phalacrocorax_brasilianus_[genbank_GCA_5F002174335.1_2017-06-06]	Phalacrocorax_brasilianus	Aves	0.5887	overlapped	<100kb	not detected	not included
Phalacrocorax_carbo_[refseq_GCF_5F000708925.1_2014-06-17]	Phalacrocorax_carbo	Aves	0.527	overlapped	diffrent_scaffold	not detected	not included
Phalacrocorax_harrisi_[genbank_GCA_5F002173475.1_2017-06-06]	Phalacrocorax_harrisi	Aves	0.635	overlapped	<100kb	not detected	not included
Phalacrocorax_pelagicus_[genbank_GCA_5F002173435.1_2017-06-06]	Phalacrocorax_pelagicus	Aves	0.491	overlapped	>100kb	NA	not included
Phasianus_colchicus_[refseq_GCF_5F004143745.1_2019-02-06]	Phasianus_colchicus	Aves	0.5321	overlapped	<100kb	not detected	Included
Pheucticus_melanocephalus_[genbank_GCA_5F013398405.1_2020-07-10]	Pheucticus_melanocephalus	Aves	0.3894	overlapped	<100kb	NA	Included
Phoebastria_albatrus_[genbank_GCA_5F014363385.1_2020-08-22]	Phoebastria_albatrus	Aves	0.6735	overlapped	diffrent_scaffold	not detected	not included
Phoenicopterus_ruber_ruber_[genbank_GCA_5F009819775.1_2019-12-31]	Phoenicopterus_ruber_ruber	Aves	0.8972	overlapped	<100kb	not detected	not included
Phrynosoma_platyrhinos_[genbank_GCA_5F020142125.1_2021-09-27]	Phrynosoma_platyrhinos	Squamata	0.7899	overlapped	<100kb	detected	Included
Phylloscopus_plumbeitarsus_[genbank_GCA_5F001655115.1_2016-06-02]	Phylloscopus_plumbeitarsus	Aves	0.2941	overlapped	diffrent_scaffold	NA	Included
Phylloscopus_trochiloides_trochiloides_[genbank_GCA_5F001655135.1_2016-06-02]	Phylloscopus_trochiloides_trochiloides	Aves	0.3894	overlapped	diffrent_scaffold	NA	not included
Phylloscopus_trochiloides_viridanus_[genbank_GCA_5F001655095.1_2016-06-02]	Phylloscopus_trochiloides_viridanus	Aves	0.3501	overlapped	diffrent_scaffold	NA	not included
Phylloscopus_trochilus_acredula_[genbank_GCA_5F002305835.1_2016-06-08]	Phylloscopus_trochilus_acredula	Aves	0.3894	overlapped	<100kb	NA	Included
Phylloscopus_trochilus_trochilus_[genbank_GCA_5F016584745.1_2021-01-08]	Phylloscopus_trochilus_trochilus	Aves	0.3894	overlapped	<100kb	NA	not included
Phylloscopus_whistleri_[genbank_GCA_5F017589585.1_2021-03-26]	Phylloscopus_whistleri	Aves	0.409	overlapped	<100kb	NA	Included
Piaya_cayana_[genbank_GCA_5F013389865.1_2020-07-06]	Piaya_cayana	Aves	0.3894	overlapped	diffrent_scaffold	NA	not included
Picathartes_gymnocephalus_[genbank_GCA_5F013390045.1_2020-07-06]	Picathartes_gymnocephalus	Aves	0.3894	overlapped	<100kb	NA	Included
Pionus_senilis_[genbank_GCA_5F011762725.1_2020-03-27]	Pionus_senilis	Aves	0.4447	overlapped	diffrent_scaffold	NA	Included
Pipra_filicauda_[refseq_GCF_5F003945595.2_2020-12-01]	Pipra_filicauda	Aves	0.3907	overlapped	<100kb	NA	Included
Piprites_chloris_[genbank_GCA_5F013399295.1_2020-07-10]	Piprites_chloris	Aves	0.3894	overlapped	<100kb	NA	Included
Pitta_sordida_[genbank_GCA_5F013390025.1_2020-07-06]	Pitta_sordida	Aves	0.3894	overlapped	<100kb	NA	Included
Pituophis_catenifer_pumilus_[genbank_GCA_5F019677565.1_2021-08-18]	Pituophis_catenifer_pumilus	Squamata	0.4146	overlapped	<100kb	NA	Included
Platysteira_castanea_[genbank_GCA_5F013397175.1_2020-07-10]	Platysteira_castanea	Aves	0.3894	overlapped	<100kb	NA	Included
Platysternon_megacephalum_[genbank_GCA_5F003942145.1_2018-12-12]	Platysternon_megacephalum	Testudines	1	overlapped	<100kb	detected	Included
Ploceus_nigricollis_[genbank_GCA_5F013399945.1_2020-07-10]	Ploceus_nigricollis	Aves	0.401	overlapped	<100kb	NA	Included
Pluvialis_apricaria_[genbank_GCA_5F017639485.1_2021-03-30]	Pluvialis_apricaria	Aves	0.7943	overlapped	<100kb	not detected	Included
Pluvianellus_socialis_[genbank_GCA_5F013400795.1_2020-07-10]	Pluvianellus_socialis	Aves	0.7866	overlapped	diffrent_scaffold	not detected	Included
Podarcis_muralis_[refseq_GCF_5F004329235.1_2019-03-07]	Podarcis_muralis	Squamata	0.9972	overlapped	<100kb	detected	not included
Podarcis_muralis_nigriventris_[genbank_GCA_5F014706415.1_2020-10-02]	Podarcis_muralis_nigriventris	Squamata	0.9972	overlapped	<100kb	detected	Included
Podargus_strigoides_[genbank_GCA_5F013399755.1_2020-07-10]	Podargus_strigoides	Aves	0.3894	overlapped	<100kb	NA	Included
Podiceps_cristatus_[genbank_GCA_5F000699545.1_2014-06-11]	Podiceps_cristatus	Aves	0.5887	overlapped	diffrent_scaffold	not detected	Included
Podilymbus_podiceps_[genbank_GCA_5F013399565.1_2020-07-10]	Podilymbus_podiceps	Aves	0.3894	overlapped	<100kb	NA	Included
Podocnemis_expansa_[genbank_GCA_5F007922195.1_2019-08-05]	Podocnemis_expansa	Testudines	0.9229	overlapped	<100kb	detected	Included
Poecile_atricapillus_[genbank_GCA_5F011421415.1_2020-03-19]	Poecile_atricapillus	Aves	0.3894	overlapped	<100kb	NA	Included
Pogona_vitticeps_[refseq_GCF_5F900067755.1_2017-02-28]	Pogona_vitticeps	Squamata	0.4006	overlapped	<100kb	NA	Included
Pogoniulus_pusillus_[genbank_GCA_5F015220805.1_2020-11-03]	Pogoniulus_pusillus	Aves	0.401	overlapped	<100kb	NA	Included
Pogoniulus_pusillus_pusillus_[genbank_GCA_5F016859755.1_2021-02-10]	Pogoniulus_pusillus_pusillus	Aves	0.395	overlapped	diffrent_scaffold	NA	not included
Polioptila_caerulea_[genbank_GCA_5F013397295.1_2020-07-10]	Polioptila_caerulea	Aves	0.3894	overlapped	<100kb	NA	Included
Pomatorhinus_ruficollis_[genbank_GCA_5F013401195.1_2020-07-10]	Pomatorhinus_ruficollis	Aves	0.3894	overlapped	<100kb	NA	not included
Pomatostomus_ruficeps_[genbank_GCA_5F013400735.1_2020-07-10]	Pomatostomus_ruficeps	Aves	0.3894	overlapped	<100kb	NA	not included
Porphyrio_hochstetteri_[genbank_GCA_5F020800305.1_2021-11-08]	Porphyrio_hochstetteri	Aves	0.419	overlapped	<100kb	NA	Included
Prinia_subflava_[genbank_GCA_5F021018805.1_2021-12-02]	Prinia_subflava	Aves	0.3894	overlapped	<100kb	NA	Included
Probosciger_aterrimus_[genbank_GCA_5F013397665.1_2020-07-10]	Probosciger_aterrimus	Aves	0.4499	overlapped	diffrent_scaffold	NA	Included
Promerops_cafer_[genbank_GCA_5F013398275.1_2020-07-10]	Promerops_cafer	Aves	0.3894	overlapped	<100kb	NA	Included
Protobothrops_flavoviridis_[genbank_GCA_5F003402635.1_2018-08-02]	Protobothrops_flavoviridis	Squamata	0.7171	overlapped	<100kb	not detected	Included
Protobothrops_mucrosquamatus_[refseq_GCF_5F001527695.2_2016-01-22]	Protobothrops_mucrosquamatus	Squamata	0.5347	overlapped	<100kb	not detected	Included
Prunella_fulvescens_[genbank_GCA_5F013400715.1_2020-07-10]	Prunella_fulvescens	Aves	0.3894	overlapped	<100kb	NA	Included
Prunella_himalayana_[genbank_GCA_5F013398875.1_2020-07-10]	Prunella_himalayana	Aves	0.3985	overlapped	<100kb	NA	Included
Pseudonaja_textilis_[refseq_GCF_5F900518735.1_2018-09-24]	Pseudonaja_textilis	Squamata	0.5098	overlapped	<100kb	not detected	Included
Pseudopodoces_humilis_[refseq_GCF_5F000331425.1_2013-01-11]	Pseudopodoces_humilis	Aves	0.409	overlapped	<100kb	NA	Included
Pseudorectes_ferrugineus_[genbank_GCA_5F008033365.1_2019-08-20]	Pseudorectes_ferrugineus	Aves	0.3894	overlapped	<100kb	NA	Included
Psilopogon_haemacephalus_[genbank_GCA_5F013396835.1_2020-07-10]	Psilopogon_haemacephalus	Aves	0.4576	overlapped	<100kb	NA	Included
Psittacula_krameri_[genbank_GCA_5F002870145.1_2018-01-09]	Psittacula_krameri	Aves	0.4422	overlapped	<100kb	NA	not included
Psittacus_erithacus_[genbank_GCA_5F009867235.1_2020-01-14]	Psittacus_erithacus	Aves	0.3985	overlapped	<100kb	NA	Included
Psittacus_timneh_[genbank_GCA_5F009867315.1_2020-01-14]	Psittacus_timneh	Aves	0.4756	overlapped	diffrent_scaffold	NA	not included
Psitteuteles_goldiei_[genbank_GCA_5F010014875.1_2020-01-30]	Psitteuteles_goldiei	Aves	0.5167	overlapped	diffrent_scaffold	not detected	Included
Psophia_crepitans_[genbank_GCA_5F013399095.1_2020-07-10]	Psophia_crepitans	Aves	0.3894	overlapped	<100kb	NA	Included
Pterocles_burchelli_[genbank_GCA_5F013397535.1_2020-07-10]	Pterocles_burchelli	Aves	0.381	overlapped	<100kb	NA	not included
Pterocles_gutturalis_[refseq_GCF_5F000699245.1_2014-06-09]	Pterocles_gutturalis	Aves	0.4473	overlapped	diffrent_scaffold	NA	Included
Pterocles_orientalis_[genbank_GCA_5F011057875.1_2020-03-02]	Pterocles_orientalis	Aves	0.455	overlapped	<100kb	NA	Included
Pteruthius_melanotis_[genbank_GCA_5F013401235.1_2020-07-10]	Pteruthius_melanotis	Aves	0.3894	overlapped	<100kb	NA	Included
Ptilonorhynchus_violaceus_[genbank_GCA_5F013397565.1_2020-07-10]	Ptilonorhynchus_violaceus	Aves	0.3894	overlapped	<100kb	NA	Included
Ptilorrhoa_leucosticta_[genbank_GCA_5F013396485.1_2020-07-10]	Ptilorrhoa_leucosticta	Aves	0.4174	overlapped	<100kb	NA	Included
Ptyas_mucosa_[genbank_GCA_5F012654045.1_2020-04-22]	Ptyas_mucosa	Squamata	0.5658	overlapped	<100kb	not detected	Included
Pycnonotus_jocosus_[genbank_GCA_5F013400435.1_2020-07-10]	Pycnonotus_jocosus	Aves	0.3894	overlapped	<100kb	NA	Included
Pygoscelis_adeliae_[refseq_GCF_5F000699105.1_2014-06-06]	Pygoscelis_adeliae	Aves	0.6735	overlapped	<100kb	not detected	Included
Pygoscelis_antarcticus_[genbank_GCA_5F010078415.1_2020-01-31]	Pygoscelis_antarcticus	Aves	0.7866	overlapped	<100kb	not detected	Included
Pygoscelis_papua_[genbank_GCA_5F010090195.1_2020-01-31]	Pygoscelis_papua	Aves	0.7866	overlapped	<100kb	not detected	Included
Pyrgilauda_ruficollis_[refseq_GCF_5F017590135.1_2021-03-26]	Pyrgilauda_ruficollis	Aves	0.3894	overlapped	<100kb	NA	Included
Pyrrhura_cruentata_[genbank_GCA_5F016545565.1_2021-01-06]	Pyrrhura_cruentata	Aves	0.4961	overlapped	diffrent_scaffold	NA	Included
Pyrrhura_frontalis_[genbank_GCA_5F010014865.1_2020-01-30]	Pyrrhura_frontalis	Aves	0.437	overlapped	diffrent_scaffold	NA	Included
Pyrrhura_griseipectus_[genbank_GCA_5F010014965.1_2020-01-30]	Pyrrhura_griseipectus	Aves	0.437	overlapped	<100kb	NA	Included
Pyrrhura_lepida_[genbank_GCA_5F015163975.1_2020-11-01]	Pyrrhura_lepida	Aves	0.491	overlapped	diffrent_scaffold	NA	Included
Pyrrhura_molinae_[genbank_GCA_5F011763355.1_2020-03-27]	Pyrrhura_molinae	Aves	0.491	overlapped	diffrent_scaffold	NA	Included
Pyrrhura_perlata_[genbank_GCA_5F011763455.1_2020-03-27]	Pyrrhura_perlata	Aves	0.437	overlapped	diffrent_scaffold	NA	Included
Python_bivittatus_[refseq_GCF_5F000186305.1_2013-09-15]	Python_bivittatus	Squamata	0.7199	overlapped	<100kb	not detected	Included
Quiscalus_mexicanus_[genbank_GCA_5F013399035.1_2020-07-10]	Quiscalus_mexicanus	Aves	0.3894	overlapped	diffrent_scaffold	NA	Included
Rafetus_swinhoei_[genbank_GCA_5F019425775.1_2021-07-30]	Rafetus_swinhoei	Testudines	0.9974	overlapped	<100kb	not detected	Included
Ramphastos_sulfuratus_[genbank_GCA_5F013399055.1_2020-07-10]	Ramphastos_sulfuratus	Aves	0.3894	overlapped	<100kb	NA	Included
Recurvirostra_avosetta_[genbank_GCA_5F004023745.1_2019-01-15]	Recurvirostra_avosetta	Aves	0.838	overlapped	<100kb	not detected	Included
Regulus_satrapa_[genbank_GCA_5F013396955.1_2020-07-10]	Regulus_satrapa	Aves	0.4034	overlapped	<100kb	NA	Included
Rhabdornis_inornatus_[genbank_GCA_5F013397075.1_2020-07-10]	Rhabdornis_inornatus	Aves	0.409	overlapped	<100kb	NA	Included
Rhadina_sibilatrix_[genbank_GCA_5F013400275.1_2020-07-10]	Rhadina_sibilatrix	Aves	0.3894	overlapped	<100kb	NA	not included
Rhagologus_leucostigma_[genbank_GCA_5F013397725.1_2020-07-10]	Rhagologus_leucostigma	Aves	0.3894	overlapped	<100kb	NA	Included
Rhea_americana_[genbank_GCA_5F003343005.1_2018-07-26]	Rhea_americana	Aves	1	overlapped	<100kb	detected	Included
Rhea_pennata_[genbank_GCA_5F003342835.1_2018-07-26]	Rhea_pennata	Aves	1	overlapped	<100kb	detected	Included
Rhegmatorhina_hoffmannsi_[genbank_GCA_5F013398505.2_2021-04-30]	Rhegmatorhina_hoffmannsi	Aves	0.3894	overlapped	<100kb	NA	Included
Rhinopomastus_cyanomelas_[genbank_GCA_5F013400115.1_2020-07-10]	Rhinopomastus_cyanomelas	Aves	0.5167	overlapped	<100kb	not detected	not included
Rhinoptilus_africanus_[genbank_GCA_5F013400135.1_2020-07-10]	Rhinoptilus_africanus	Aves	0.7455	overlapped	<100kb	not detected	Included
Rhipidura_dahli_[genbank_GCA_5F013399225.1_2020-07-10]	Rhipidura_dahli	Aves	0.3894	overlapped	<100kb	NA	Included
Rhodinocichla_rosea_[genbank_GCA_5F013396575.1_2020-07-10]	Rhodinocichla_rosea	Aves	0.3894	overlapped	<100kb	NA	Included
Rhynochetos_jubatus_[genbank_GCA_5F013398095.1_2020-07-10]	Rhynochetos_jubatus	Aves	0.6041	overlapped	<100kb	not detected	Included
Riparia_riparia_[genbank_GCA_5F020917445.1_2021-11-22]	Riparia_riparia	Aves	0.3894	overlapped	diffrent_scaffold	NA	Included
Rissa_tridactyla_[genbank_GCA_5F013401015.1_2020-07-10]	Rissa_tridactyla	Aves	0.8586	overlapped	<100kb	not detected	Included
Rostratula_benghalensis_[genbank_GCA_5F013399305.1_2020-07-10]	Rostratula_benghalensis	Aves	0.3894	overlapped	<100kb	NA	Included
Rynchops_niger_[genbank_GCA_5F013400035.1_2020-07-10]	Rynchops_niger	Aves	0.4319	overlapped	<100kb	NA	Included
Sagittarius_serpentarius_[genbank_GCA_5F013399415.1_2020-07-10]	Sagittarius_serpentarius	Aves	0.8817	overlapped	diffrent_scaffold	not detected	Included
Sakesphorus_luctuosus_[genbank_GCA_5F013396695.1_2020-07-10]	Sakesphorus_luctuosus	Aves	0.3894	overlapped	<100kb	NA	Included
Salvator_merianae_[genbank_GCA_5F003586115.2_2018-12-11]	Salvator_merianae	Squamata	0.3894	overlapped	<100kb	NA	Included
Sapayoa_aenigma_[genbank_GCA_5F013398745.1_2020-07-10]	Sapayoa_aenigma	Aves	0.3894	overlapped	<100kb	NA	Included
Saxicola_maurus_maurus_[genbank_GCA_5F900205225.1_2017-09-28]	Saxicola_maurus_maurus	Aves	0.3894	overlapped	<100kb	NA	Included
Sceloporus_tristichus_[genbank_GCA_5F016801065.1_2021-02-04]	Sceloporus_tristichus	Squamata	0.8039	overlapped	<100kb	detected	Included
Sceloporus_undulatus_[refseq_GCF_5F019175285.1_2021-07-08]	Sceloporus_undulatus	Squamata	0.7815	overlapped	<100kb	detected	Included
Sclerurus_mexicanus_[genbank_GCA_5F013396755.1_2020-07-10]	Sclerurus_mexicanus	Aves	0.3894	overlapped	<100kb	NA	Included
Scolopax_mira_[genbank_GCA_5F004320125.1_2019-02-15]	Scolopax_mira	Aves	0.6658	overlapped	<100kb	not detected	Included
Scopus_umbretta_[genbank_GCA_5F013400535.1_2020-07-10]	Scopus_umbretta	Aves	0.6067	overlapped	diffrent_scaffold	not detected	Included
Scytalopus_superciliaris_[genbank_GCA_5F013400415.1_2020-07-10]	Scytalopus_superciliaris	Aves	0.3894	overlapped	<100kb	NA	Included
Semnornis_frantzii_[genbank_GCA_5F013399775.1_2020-07-10]	Semnornis_frantzii	Aves	0.3894	overlapped	<100kb	NA	Included
Serilophus_lunatus_[genbank_GCA_5F013399895.1_2020-07-10]	Serilophus_lunatus	Aves	0.3894	overlapped	<100kb	NA	Included
Serinus_canaria_[genbank_GCA_5F007115625.1_2019-07-29]	Serinus_canaria	Aves	0.3894	overlapped	<100kb	NA	Included
Setophaga_coronata_coronata_[genbank_GCA_5F001746935.2_2020-12-08]	Setophaga_coronata_coronata	Aves	0.3894	overlapped	<100kb	NA	Included
Setophaga_kirtlandii_[genbank_GCA_5F013399655.1_2020-07-10]	Setophaga_kirtlandii	Aves	0.3894	overlapped	<100kb	NA	Included
Shinisaurus_crocodilurus_[genbank_GCA_5F021292165.1_2021-12-28]	Shinisaurus_crocodilurus	Squamata	0.9552	overlapped	<100kb	detected	Included
Sialia_sialis_[genbank_GCA_5F009812075.1_2019-12-31]	Sialia_sialis	Aves	0.3894	overlapped	<100kb	NA	Included
Sinosuthora_webbiana_[genbank_GCA_5F013397395.1_2020-07-10]	Sinosuthora_webbiana	Aves	0.3894	overlapped	<100kb	NA	Included
Sitta_europaea_[genbank_GCA_5F013400255.1_2020-07-10]	Sitta_europaea	Aves	0.3894	overlapped	<100kb	NA	Included
Smithornis_capensis_[genbank_GCA_5F013396465.1_2020-07-10]	Smithornis_capensis	Aves	0.3894	overlapped	<100kb	NA	Included
Sphaerodactylus_townsendi_[genbank_GCA_5F021028975.1_2021-12-03]	Sphaerodactylus_townsendi	Squamata	0.8711	overlapped	<100kb	detected	Included
Spheniscus_demersus_[genbank_GCA_5F010077935.1_2020-01-31]	Spheniscus_demersus	Aves	0.7506	overlapped	<100kb	not detected	Included
Spheniscus_humboldti_[genbank_GCA_5F010076325.1_2020-01-31]	Spheniscus_humboldti	Aves	0.5398	overlapped	<100kb	not detected	Included
Spheniscus_magellanicus_[genbank_GCA_5F010076225.1_2020-01-31]	Spheniscus_magellanicus	Aves	0.6967	overlapped	>100kb	not detected	Included
Spheniscus_mendiculus_[genbank_GCA_5F003264655.1_2018-06-25]	Spheniscus_mendiculus	Aves	0.7969	overlapped	<100kb	not detected	Included
Sphenodon_punctatus_[genbank_GCA_5F003113815.1_2018-05-10]	Sphenodon_punctatus	Rhynchocephalia	0.6195	overlapped	diffrent_scaffold	not detected	Included
Spizaetus_tyrannus_[genbank_GCA_5F013399215.1_2020-07-10]	Spizaetus_tyrannus	Aves	0.4653	overlapped	<100kb	NA	not included
Spizella_passerina_[genbank_GCA_5F013401375.1_2020-07-10]	Spizella_passerina	Aves	0.3697	overlapped	diffrent_scaffold	NA	Included
Sporophila_hypoxantha_[genbank_GCA_5F002167245.1_2017-06-05]	Sporophila_hypoxantha	Aves	0.3894	overlapped	<100kb	NA	Included
Steatornis_caripensis_[genbank_GCA_5F013398225.1_2020-07-10]	Steatornis_caripensis	Aves	0.7558	overlapped	<100kb	not detected	Included
Stercorarius_parasiticus_[genbank_GCA_5F013396915.1_2020-07-10]	Stercorarius_parasiticus	Aves	0.7815	overlapped	<100kb	not detected	Included
Sterna_hirundo_[genbank_GCA_5F009819605.1_2019-12-31]	Sterna_hirundo	Aves	0.5938	overlapped	<100kb	not detected	Included
Sterrhoptilus_dennistouni_[genbank_GCA_5F013397095.1_2020-07-10]	Sterrhoptilus_dennistouni	Aves	0.3894	overlapped	<100kb	NA	not included
Stictonetta_naevosa_[genbank_GCA_5F011074415.1_2020-03-10]	Stictonetta_naevosa	Aves	0.6144	overlapped	<100kb	not detected	not included
Streptopelia_turtur_[genbank_GCA_5F901699155.2_2021-05-17]	Streptopelia_turtur	Aves	0.3894	overlapped	diffrent_scaffold	NA	Included
Strigops_habroptila_[refseq_GCF_5F004027225.2_2020-03-04]	Strigops_habroptila	Aves	0.5398	overlapped	<100kb	not detected	Included
Strix_nebulosa_[genbank_GCA_5F017310255.1_2021-03-09]	Strix_nebulosa	Aves	0.7172	overlapped	<100kb	not detected	Included
Strix_occidentalis_caurina_[genbank_GCA_5F002372975.2_2021-04-12]	Strix_occidentalis_caurina	Aves	0.7044	overlapped	<100kb	not detected	not included
Struthidea_cinerea_[genbank_GCA_5F013397865.1_2020-07-10]	Struthidea_cinerea	Aves	0.3894	overlapped	<100kb	NA	Included
Struthio_camelus_australis_[refseq_GCF_5F000698965.1_2014-06-06]	Struthio_camelus_australis	Aves	1	overlapped	<100kb	detected	Included
Sturnus_vulgaris_[refseq_GCF_5F001447265.1_2015-11-20]	Sturnus_vulgaris	Aves	0.3894	overlapped	<100kb	NA	Included
Sula_dactylatra_[genbank_GCA_5F013389905.1_2020-07-06]	Sula_dactylatra	Aves	0.6632	overlapped	<100kb	not detected	Included
Sylvia_atricapilla_[genbank_GCA_5F009819655.1_2019-12-31]	Sylvia_atricapilla	Aves	0.3894	overlapped	<100kb	NA	Included
Sylvia_borin_[genbank_GCA_5F014839755.1_2020-10-02]	Sylvia_borin	Aves	0.3838	overlapped	<100kb	NA	Included
Sylvietta_virens_[genbank_GCA_5F013399515.1_2020-07-10]	Sylvietta_virens	Aves	0.3894	overlapped	<100kb	NA	Included
Syrmaticus_mikado_[genbank_GCA_5F003435085.1_2018-08-31]	Syrmaticus_mikado	Aves	0.4627	overlapped	<100kb	NA	Included
Syrrhaptes_paradoxus_[genbank_GCA_5F013400615.1_2020-07-10]	Syrrhaptes_paradoxus	Aves	0.4036	overlapped	<100kb	NA	Included
Tachuris_rubrigastra_[genbank_GCA_5F013396555.1_2020-07-10]	Tachuris_rubrigastra	Aves	0.3894	overlapped	<100kb	NA	Included
Tachycineta_bicolor_[genbank_GCA_5F007636935.1_2019-07-30]	Tachycineta_bicolor	Aves	0.3894	overlapped	<100kb	NA	Included
Taeniopygia_guttata_[refseq_GCF_5F003957565.2_2021-05-04]	Taeniopygia_guttata	Aves	0.4034	overlapped	<100kb	NA	Included
Tauraco_erythrolophus_[refseq_GCF_5F000709365.1_2014-06-25]	Tauraco_erythrolophus	Aves	0.7506	overlapped	diffrent_scaffold	not detected	Included
Terrapene_carolina_triunguis_[refseq_GCF_5F002925995.2_2018-09-21]	Terrapene_carolina_triunguis	Testudines	1	overlapped	<100kb	detected	Included
Tetrax_tetrax_[genbank_GCA_5F009806455.1_2019-12-27]	Tetrax_tetrax	Aves	0.3894	overlapped	diffrent_scaffold	NA	not included
Thalassarche_chlororhynchos_[genbank_GCA_5F013400895.1_2020-07-10]	Thalassarche_chlororhynchos	Aves	0.6735	overlapped	diffrent_scaffold	not detected	Included
Thamnophis_elegans_[refseq_GCF_5F009769535.1_2019-12-23]	Thamnophis_elegans	Squamata	0.5658	overlapped	<100kb	not detected	Included
Thamnophis_sirtalis_[refseq_GCF_5F001077635.1_2015-06-26]	Thamnophis_sirtalis	Squamata	0.3573	not overlapped	<100kb	NA	Included
Theristicus_caerulescens_[genbank_GCA_5F020745775.1_2021-11-05]	Theristicus_caerulescens	Aves	0.8689	overlapped	<100kb	not detected	Included
Thermophis_baileyi_[genbank_GCA_5F003457575.1_2018-09-05]	Thermophis_baileyi	Squamata	0.5658	overlapped	<100kb	not detected	Included
Thinocorus_orbignyianus_[genbank_GCA_5F013400375.1_2020-07-10]	Thinocorus_orbignyianus	Aves	0.7249	overlapped	<100kb	not detected	Included
Thryothorus_ludovicianus_[genbank_GCA_5F013397245.1_2020-07-10]	Thryothorus_ludovicianus	Aves	0.3894	overlapped	<100kb	NA	Included
Tichodroma_muraria_[genbank_GCA_5F013390105.1_2020-07-06]	Tichodroma_muraria	Aves	0.3894	overlapped	diffrent_scaffold	NA	Included
Tinamus_guttatus_[refseq_GCF_5F000705375.1_2014-08-05]	Tinamus_guttatus	Aves	1	overlapped	<100kb	detected	Included
Todus_mexicanus_[genbank_GCA_5F013389965.1_2020-07-06]	Todus_mexicanus	Aves	0.4113	overlapped	diffrent_scaffold	NA	Included
Toxostoma_redivivum_[genbank_GCA_5F013397375.1_2020-07-10]	Toxostoma_redivivum	Aves	0.4034	overlapped	<100kb	NA	Included
Trachemys_scripta_elegans_[refseq_GCF_5F013100865.1_2020-05-15]	Trachemys_scripta_elegans	Testudines	1	overlapped	<100kb	detected	Included
Tricholaema_leucomelas_[genbank_GCA_5F013400475.1_2020-07-10]	Tricholaema_leucomelas	Aves	0.4499	overlapped	<100kb	NA	not included
Trogon_melanurus_[genbank_GCA_5F013399275.1_2020-07-10]	Trogon_melanurus	Aves	0.5604	overlapped	<100kb	not detected	Included
Trogon_surrucura_[genbank_GCA_5F020746105.1_2021-11-05]	Trogon_surrucura	Aves	0.4884	overlapped	<100kb	NA	Included
Turdus_rufiventris_[genbank_GCA_5F013186435.1_2020-05-28]	Turdus_rufiventris	Aves	0.3894	overlapped	<100kb	NA	Included
Turnix_velox_[genbank_GCA_5F013400935.1_2020-07-10]	Turnix_velox	Aves	0.3894	overlapped	<100kb	NA	Included
Tympanuchus_cupido_pinnatus_[genbank_GCA_5F001870855.1_2016-11-07]	Tympanuchus_cupido_pinnatus	Aves	0.4165	not overlapped	<100kb	NA	Included
Tyrannus_savana_[genbank_GCA_5F013399735.1_2020-07-10]	Tyrannus_savana	Aves	0.3894	overlapped	<100kb	NA	Included
Tyto_alba_[refseq_GCF_5F018691265.1_2021-06-03]	Tyto_alba	Aves	0.6093	overlapped	<100kb	not detected	Included
Tyto_alba_alba_[genbank_GCA_5F902150015.1_2020-02-10]	Tyto_alba_alba	Aves	0.671	overlapped	<100kb	not detected	not included
Upupa_epops_[genbank_GCA_5F013397515.1_2020-07-10]	Upupa_epops	Aves	0.4165	overlapped	<100kb	NA	Included
Uria_aalge_[genbank_GCA_5F013401055.1_2020-07-10]	Uria_aalge	Aves	0.7301	overlapped	<100kb	not detected	not included
Uria_aalge_inornata_[genbank_GCA_5F014363425.1_2020-08-22]	Uria_aalge_inornata	Aves	0.7789	overlapped	<100kb	not detected	Included
Uria_lomvia_[genbank_GCA_5F002289315.1_2017-09-11]	Uria_lomvia	Aves	0.5501	overlapped	<100kb	not detected	Included
Urocolius_indicus_[genbank_GCA_5F013401255.1_2020-07-10]	Urocolius_indicus	Aves	0.3697	overlapped	diffrent_scaffold	NA	Included
Urocynchramus_pylzowi_[genbank_GCA_5F013397555.1_2020-07-10]	Urocynchramus_pylzowi	Aves	0.3894	overlapped	diffrent_scaffold	NA	not included
Varanus_komodoensis_[refseq_GCF_5F004798865.1_2019-04-17]	Varanus_komodoensis	Squamata	0.6835	overlapped	<100kb	not detected	Included
Vidua_chalybeata_[genbank_GCA_5F013398495.1_2020-07-10]	Vidua_chalybeata	Aves	0.3894	overlapped	<100kb	NA	Included
Vidua_macroura_[genbank_GCA_5F013400395.1_2020-07-10]	Vidua_macroura	Aves	0.3894	overlapped	<100kb	NA	Included
Vipera_berus_berus_[genbank_GCA_5F000800605.1_2014-12-10]	Vipera_berus_berus	Squamata	0.5347	overlapped	<100kb	not detected	Included
Vireo_altiloquus_[genbank_GCA_5F013396875.1_2020-07-10]	Vireo_altiloquus	Aves	0.395	overlapped	<100kb	NA	Included
Willisornis_vidua_nigrigula_[genbank_GCA_5F021164005.1_2021-12-10]	Willisornis_vidua_nigrigula	Aves	0.3894	overlapped	diffrent_scaffold	NA	Included
Xiphorhynchus_elegans_[genbank_GCA_5F013401175.1_2020-07-10]	Xiphorhynchus_elegans	Aves	0.3894	overlapped	diffrent_scaffold	NA	Included
Zapornia_atra_[genbank_GCA_5F013400835.1_2020-07-10]	Zapornia_atra	Aves	0.5193	overlapped	<100kb	not detected	not included
Zonotrichia_albicollis_[refseq_GCF_5F000385455.1_2013-04-30]	Zonotrichia_albicollis	Aves	0.3894	overlapped	<100kb	NA	Included
Zootoca_vivipara_[refseq_GCF_5F011800845.1_2020-04-01]	Zootoca_vivipara	Squamata	0.93	overlapped	<100kb	detected	Included
Zosterops_borbonicus_[genbank_GCA_5F007252995.1_2019-07-22]	Zosterops_borbonicus	Aves	0.3894	overlapped	<100kb	NA	Included
Zosterops_hypoxanthus_[genbank_GCA_5F013399795.1_2020-07-10]	Zosterops_hypoxanthus	Aves	0.3894	overlapped	<100kb	NA	not included
Zosterops_japonicus_[genbank_GCA_5F017612475.1_2021-03-29]	Zosterops_japonicus	Aves	0.3933	overlapped	<100kb	NA	Included
Zosterops_lateralis_melanops_[genbank_GCA_5F001281735.1_2015-09-14]	Zosterops_lateralis_melanops	Aves	0.3894	overlapped	<100kb	NA	Included
Zosterops_pallidus_[genbank_GCA_5F007556475.1_2019-07-26]	Zosterops_pallidus	Aves	0.4267	overlapped	<100kb	NA	Included
