# Supplementary material for: Birth of protein-coding exons by ancient domestication of LINE-1 retrotransposon
Source: HighWire-hosted journal article supplement (doi:10.1101/gr.280007.124), 2025-05-08
Supplement: Supplemental_Table_S5.xlsx [file Supplemental_Table_S5.xlsx]

## Sheet: RFX5_exonInfo
Supplemental Table S5. Summary of genomic analysis for L1-RFX5 by BLAT search, exon identification, and phylogenetic tree.
Genome	Species	Taxonomy	Query cover by BLAT	Canonical isoform	Neighbor gene	Intact exon
GCF_001660625.3_Coco_2.0_genomic	Ictalurus_punctatus	Siluriformes	0.9359	overlapped	<100kb	detected
GCF_014805685.1_ASM1480568v1_genomic	Silurus_meridionalis	Siluriformes	0.8141	overlapped	<100kb	detected
GCF_019097595.1_SWU_Hwy_1.0_genomic	Hemibagrus_wyckioides	Siluriformes	0.9244	overlapped	<100kb	detected
GCF_022655615.1_HZAU_PFXX_2.0_genomic	Tachysurus_fulvidraco	Siluriformes	0.9987	overlapped	<100kb	detected
GCF_023375685.1_Billie_1.0_genomic	Ictalurus_furcatus	Siluriformes	0.9051	overlapped	<100kb	detected
GCF_024256425.1_CGAR_prim_01v2_genomic	Clarias_gariepinus	Siluriformes	0.7872	overlapped	<100kb	detected
GCF_027358585.1_fPanHyp1.pri_genomic	Pangasianodon_hypophthalmus	Siluriformes	0.9436	overlapped	<100kb	detected
GCF_030014155.1_HZAU_Pvac_v1_genomic	Tachysurus_vachellii	Siluriformes	0.9897	overlapped	<100kb	detected
GCF_000002035.6_GRCz11_genomic	Danio_rerio	Cypriniformes	0.3731	overlapped	<100kb	NA
GCF_001515605.1_SAMN03320099.WGS_v1.1_genomic	Sinocyclocheilus_anshuiensis	Cypriniformes	0.3705	overlapped	diffrent_scaffold	NA
GCF_001515625.1_SAMN03320098_v1.1_genomic	Sinocyclocheilus_rhinocerous	Cypriniformes	0.3769	overlapped	diffrent_scaffold	NA
GCF_001515645.1_SAMN03320097.WGS_v1.1_genomic	Sinocyclocheilus_grahami	Cypriniformes	0.3308	overlapped	>100kb	NA
GCF_003368295.1_ASM336829v1_genomic	Carassius_auratus	Cypriniformes	0.3474	overlapped	<100kb	NA
GCF_012432095.1_ASM1243209v1_genomic	Onychostoma_macrolepis	Cypriniformes	0.3564	overlapped	<100kb	NA
GCF_013358815.1_fEleEle1.pri_genomic	Electrophorus_electricus	Gymnotiformes	0.3974	overlapped	<100kb	NA
GCF_015220715.1_fPygNat1.pri_genomic	Pygocentrus_nattereri	Characiformes	0.3603	overlapped	<100kb	NA
GCF_015846415.1_ASM1584641v1_genomic	Triplophysa_dalaica	Cypriniformes	0.3641	overlapped	<100kb	NA
GCF_016745375.1_EPA_FHM_2.0_genomic	Pimephales_promelas	Cypriniformes	0.3692	overlapped	>100kb	NA
GCF_018340385.1_ASM1834038v1_genomic	Cyprinus_carpio	Cypriniformes	0.3397	overlapped	diffrent_scaffold	NA
GCF_018812025.1_ASM1881202v1_genomic	Megalobrama_amblycephala	Cypriniformes	0.3115	overlapped	<100kb	NA
GCF_018831695.1_ASM1883169v1_genomic	Puntigrus_tetrazona	Cypriniformes	0.3231	overlapped	<100kb	NA
GCF_019703515.2_UBuf_Myxa_2_genomic	Myxocyprinus_asiaticus	Cypriniformes	0.3641	overlapped	diffrent_scaffold	NA
GCF_019924925.1_HZGC01_genomic	Ctenopharyngodon_idella	Cypriniformes	0.3	overlapped	<100kb	NA
GCF_022985175.1_IGBB_LRoh.1.0_genomic	Labeo_rohita	Cypriniformes	0.3769	overlapped	<100kb	NA
GCF_023375975.1_AstMex3_surface_genomic	Astyanax_mexicanus	Characiformes	0.4013	overlapped	<100kb	NA
GCF_023724105.1_carGib1.2-hapl.c_genomic	Carassius_gibelio	Cypriniformes	0.3603	overlapped	diffrent_scaffold	NA
GCF_024868665.1_Trosa_1v2_genomic	Triplophysa_rosa	Cypriniformes	0.2962	overlapped	<100kb	NA
GCF_025860055.1_RBS_HiC_50CHRs_genomic	Xyrauchen_texanus	Cypriniformes	0.3346	overlapped	diffrent_scaffold	NA
GCF_027580225.1_HAU_Mang_1.0_genomic	Misgurnus_anguillicaudatus	Cypriniformes	0.2987	overlapped	<100kb	NA
GCF_029890125.1_OSU_Roscu_1.1_genomic	Rhinichthys_klamathensis_goyatoka	Cypriniformes	0.291	overlapped	<100kb	NA
GCF_030014385.1_fTriRos1.hap1_genomic	Trichomycterus_rosablanca	Siluriformes	0.4564	overlapped	<100kb	NA
GCF_030506205.1_PD_contigs_1.0_genomic	Paramisgurnus_dabryanus	Cypriniformes	0.3603	overlapped	<100kb	NA
GCF_903798145.1_fDanAes4.1_genomic	Danio_aesculapii	Cypriniformes	0.3423	overlapped	<100kb	NA
GCF_904425465.1_Colossoma_macropomum_genomic	Colossoma_macropomum	Characiformes	0.3436	overlapped	>100kb	NA
GCF_963082965.1_fCarCar2.1_genomic	Carassius_carassius	Cypriniformes	0.3321	overlapped	diffrent_scaffold	NA
GCF_027579695.1_fNeoGra1.pri_genomic	Neoarius_graeffei	Siluriformes	0.8077	overlapped	<100kb	not detected
