# Supplementary material for: Birth of protein-coding exons by ancient domestication of LINE-1 retrotransposon
Source: HighWire-hosted journal article supplement (doi:10.1101/gr.280007.124), 2025-05-08
Supplement: Supplemental_Table_S6.xlsx [file Supplemental_Table_S6.xlsx]

## Sheet: NUP42_exonInfo
Supplemental Table S6. Summary of genomic analysis for NUP42-L1 by BLAT search, exon identification, and phylogenetic tree.
Genome	Species	Taxonomy	Query cover by BLAT	Canonical isoform	Neighbor gene	Intact exon
Chrysochloris_asiatica_[refseq_GCF_5F000296735.1_2012-09-19]	Chrysochloris_asiatica	Afrotheria	0.776	not overlapped	diffrent_scaffold	NA
Dugong_dugon_[genbank_GCA_5F015147995.1_2020-08-31]	Dugong_dugon	Afrotheria	0.9842	not overlapped	diffrent_scaffold	NA
Echinops_telfairi_[refseq_GCF_5F000313985.2_2019-07-15]	Echinops_telfairi	Afrotheria	0.5317	overlapped	<100kb	detected
Elephantulus_edwardii_[refseq_GCF_5F000299155.1_2012-10-10]	Elephantulus_edwardii	Afrotheria	0.81	overlapped	<100kb	detected
Elephas_maximus_[genbank_GCA_5F014332765.1_2020-08-28]	Elephas_maximus	Afrotheria	1	overlapped	<100kb	detected
Heterohyrax_brucei_[genbank_GCA_5F004026845.1_2019-01-16]	Heterohyrax_brucei	Afrotheria	0.8914	overlapped	<100kb	not detected
Hydrodamalis_gigas_[genbank_GCA_5F013391785.1_2020-07-08]	Hydrodamalis_gigas	Afrotheria	0.6697	not overlapped	diffrent_scaffold	NA
Loxodonta_africana_[refseq_GCF_5F000001905.1_2009-07-15]	Loxodonta_africana	Afrotheria	1	overlapped	<100kb	detected
Microgale_talazaci_[genbank_GCA_5F004026705.1_2019-01-16]	Microgale_talazaci	Afrotheria	0.776	not overlapped	diffrent_scaffold	NA
Orycteropus_afer_[genbank_GCA_5F004365145.1_2019-03-22]	Orycteropus_afer	Afrotheria	0.9344	not overlapped	diffrent_scaffold	NA
Orycteropus_afer_afer_[refseq_GCF_5F000298275.1_2012-09-20]	Orycteropus_afer_afer	Afrotheria	0.9321	not overlapped	diffrent_scaffold	NA
Procavia_capensis_[genbank_GCA_5F004026925.2_2019-07-15]	Procavia_capensis	Afrotheria	0.9253	overlapped	diffrent_scaffold	not detected
Trichechus_manatus_latirostris_[refseq_GCF_5F000243295.1_2012-01-23]	Trichechus_manatus_latirostris	Afrotheria	1	overlapped	<100kb	detected
