# Supplementary material for: Birth of protein-coding exons by ancient domestication of LINE-1 retrotransposon
Source: HighWire-hosted journal article supplement (doi:10.1101/gr.280007.124), 2025-05-08
Supplement: Supplemental_Table_S7.xlsx [file Supplemental_Table_S7.xlsx]

## Sheet: USP4_exonInfo
Supplemental Table S7. Summary of genomic analysis for USP4-L1 by BLAT search, exon identification, and phylogenetic tree.
Genome	Species	Taxonomy	Query cover by BLAT	Canonical isoform	Neighbor gene	Intact exon
Acinonyx_jubatus_[refseq_GCF_5F003709585.1_2018-10-22]	Acinonyx_jubatus	Feliformia	0.4823	overlapped	<100kb	NA
Ailuropoda_melanoleuca_[refseq_GCF_5F002007445.1_2020-04-20]	Ailuropoda_melanoleuca	Ursoidea	0.9771	overlapped	<100kb	not detected
Ailurus_fulgens_styani_[genbank_GCA_5F002007465.1_2017-02-28]	Ailurus_fulgens_styani	Musteloidea	0.973	overlapped	<100kb	detected
Arctocephalus_gazella_[genbank_GCA_5F900642305.1_2019-02-08]	Arctocephalus_gazella	Pinnipedia	0.9958	overlapped	<100kb	detected
Callorhinus_ursinus_[refseq_GCF_5F003265705.1_2018-06-26]	Callorhinus_ursinus	Pinnipedia	0.9958	overlapped	<100kb	detected
Canis_lupus_[genbank_GCA_5F905319855.2_2021-03-26]	Canis_lupus	Canidae	0.7755	overlapped	<100kb	not detected
Caracal_caracal_[genbank_GCA_5F016801355.1_2021-02-02]	Caracal_caracal	Feliformia	0.4823	overlapped	<100kb	NA
Crocuta_crocuta_[genbank_GCA_5F008692635.1_2019-10-07]	Crocuta_crocuta	Feliformia	0.4823	overlapped	<100kb	NA
Cryptoprocta_ferox_[genbank_GCA_5F004023885.1_2019-01-15]	Cryptoprocta_ferox	Feliformia	0.4823	overlapped	<100kb	NA
Eira_barbara_[genbank_GCA_5F020311295.1_2021-10-05]	Eira_barbara	Musteloidea	0.9522	overlapped	<100kb	not detected
Enhydra_lutris_nereis_[genbank_GCA_5F006410715.1_2019-06-24]	Enhydra_lutris_nereis	Musteloidea	0.9771	overlapped	<100kb	not detected
Eumetopias_jubatus_[refseq_GCF_5F004028035.1_2019-01-15]	Eumetopias_jubatus	Pinnipedia	0.9958	overlapped	<100kb	detected
Felis_catus_[refseq_GCF_5F018350175.1_2021-05-13]	Felis_catus	Feliformia	0.4823	overlapped	<100kb	NA
Felis_chaus_[genbank_GCA_5F019924945.1_2021-09-14]	Felis_chaus	Feliformia	0.4823	overlapped	<100kb	NA
Felis_nigripes_[genbank_GCA_5F004023925.1_2019-01-15]	Felis_nigripes	Feliformia	0.3306	not overlapped	diffrent_scaffold	NA
Gulo_gulo_[genbank_GCA_5F900006375.2_2018-12-06]	Gulo_gulo	Musteloidea	0.9647	overlapped	<100kb	not detected
Halichoerus_grypus_[genbank_GCA_5F012393455.1_2020-04-16]	Halichoerus_grypus	Pinnipedia	0.9979	overlapped	<100kb	detected
Helogale_parvula_[genbank_GCA_5F004023845.1_2019-01-15]	Helogale_parvula	Feliformia	0.4823	overlapped	<100kb	NA
Hyaena_hyaena_[refseq_GCF_5F003009895.1_2018-03-19]	Hyaena_hyaena	Feliformia	0.4823	overlapped	<100kb	NA
Leopardus_geoffroyi_[refseq_GCF_5F018350155.1_2021-05-13]	Leopardus_geoffroyi	Feliformia	0.4823	overlapped	<100kb	NA
Leptonychotes_weddellii_[refseq_GCF_5F000349705.1_2013-03-29]	Leptonychotes_weddellii	Pinnipedia	0.8358	not overlapped	<100kb	NA
Lontra_canadensis_[refseq_GCF_5F010015895.1_2020-01-27]	Lontra_canadensis	Musteloidea	0.948	overlapped	<100kb	not detected
Lutra_lutra_[genbank_GCA_5F902655055.2_2020-07-31]	Lutra_lutra	Musteloidea	0.9709	overlapped	<100kb	not detected
Lycaon_pictus_[genbank_GCA_5F004216515.1_2019-02-20]	Lycaon_pictus	Canidae	0.7526	overlapped	No_hit	not detected
Lynx_canadensis_[refseq_GCF_5F007474595.2_2020-07-14]	Lynx_canadensis	Feliformia	0.4823	overlapped	<100kb	NA
Lynx_pardinus_[genbank_GCA_5F900661375.1_2019-03-28]	Lynx_pardinus	Feliformia	0.4823	overlapped	<100kb	NA
Martes_zibellina_[genbank_GCA_5F012583365.1_2020-04-20]	Martes_zibellina	Musteloidea	0.6299	overlapped	<100kb	not detected
Meles_meles_[genbank_GCA_5F922984935.1_2021-12-19]	Meles_meles	Musteloidea	0.9605	overlapped	<100kb	not detected
Mellivora_capensis_[genbank_GCA_5F004024625.1_2019-01-15]	Mellivora_capensis	Musteloidea	0.9439	not overlapped	diffrent_scaffold	NA
Mirounga_angustirostris_[genbank_GCA_5F021288785.1_2021-12-26]	Mirounga_angustirostris	Pinnipedia	1	overlapped	<100kb	detected
Mirounga_leonina_[refseq_GCF_5F011800145.1_2020-03-31]	Mirounga_leonina	Pinnipedia	1	overlapped	<100kb	detected
Mungos_mungo_[genbank_GCA_5F004023785.1_2019-01-15]	Mungos_mungo	Feliformia	0.4823	overlapped	<100kb	NA
Mustela_erminea_[refseq_GCF_5F009829155.1_2020-01-03]	Mustela_erminea	Musteloidea	0.9667	overlapped	<100kb	not detected
Mustela_nivalis_[genbank_GCA_5F019141155.1_2021-07-06]	Mustela_nivalis	Musteloidea	0.9584	overlapped	<100kb	not detected
Mustela_putorius_[genbank_GCA_5F902460175.1_2019-08-28]	Mustela_putorius	Musteloidea	0.9064	overlapped	<100kb	not detected
Mustela_putorius_furo_[refseq_GCF_5F011764305.1_2020-03-27]	Mustela_putorius_furo	Musteloidea	0.9584	overlapped	<100kb	not detected
Neogale_vison_[refseq_GCF_5F020171115.1_2021-09-29]	Neogale_vison	Musteloidea	0.9688	overlapped	<100kb	not detected
Neomonachus_schauinslandi_[refseq_GCF_5F002201575.2_2021-10-20]	Neomonachus_schauinslandi	Pinnipedia	0.9813	overlapped	<100kb	not detected
Nyctereutes_procyonoides_[genbank_GCA_5F905146905.1_2021-02-14]	Nyctereutes_procyonoides	Canidae	0.7734	overlapped	<100kb	not detected
Odobenus_rosmarus_divergens_[refseq_GCF_5F000321225.1_2013-01-16]	Odobenus_rosmarus_divergens	Pinnipedia	0.9896	overlapped	<100kb	not detected
Otocyon_megalotis_megalotis_[genbank_GCA_5F017311455.1_2021-03-09]	Otocyon_megalotis_megalotis	Canidae	0.869	overlapped	<100kb	not detected
Panthera_leo_[refseq_GCF_5F018350215.1_2021-05-13]	Panthera_leo	Feliformia	0.4823	overlapped	<100kb	NA
Panthera_onca_[genbank_GCA_5F004023805.1_2019-01-15]	Panthera_onca	Feliformia	0.4823	overlapped	<100kb	NA
Panthera_pardus_[refseq_GCF_5F001857705.1_2016-11-16]	Panthera_pardus	Feliformia	0.3306	not overlapped	diffrent_scaffold	NA
Panthera_tigris_[refseq_GCF_5F018350195.1_2021-05-13]	Panthera_tigris	Feliformia	0.4823	overlapped	<100kb	NA
Paradoxurus_hermaphroditus_[genbank_GCA_5F004024585.1_2019-01-15]	Paradoxurus_hermaphroditus	Feliformia	0.4823	overlapped	<100kb	NA
Phoca_vitulina_[refseq_GCF_5F004348235.1_2019-02-11]	Phoca_vitulina	Pinnipedia	0.9979	overlapped	<100kb	detected
Potos_flavus_[genbank_GCA_5F015708855.1_2020-12-01]	Potos_flavus	Musteloidea	0.4823	overlapped	<100kb	NA
Prionailurus_bengalensis_[refseq_GCF_5F016509475.1_2021-01-06]	Prionailurus_bengalensis	Feliformia	0.4823	overlapped	<100kb	NA
Prionailurus_bengalensis_euptilurus_[genbank_GCA_5F005406085.2_2020-09-15]	Prionailurus_bengalensis_euptilurus	Feliformia	0.4823	overlapped	diffrent_scaffold	NA
Prionailurus_iriomotensis_[genbank_GCA_5F018403415.1_2021-03-31]	Prionailurus_iriomotensis	Feliformia	0.4823	not overlapped	diffrent_scaffold	NA
Prionailurus_viverrinus_[genbank_GCA_5F018119265.1_2021-04-21]	Prionailurus_viverrinus	Feliformia	0.4823	overlapped	<100kb	NA
Procyon_lotor_[genbank_GCA_5F015708975.1_2020-12-01]	Procyon_lotor	Musteloidea	0.3992	overlapped	<100kb	NA
Proteles_cristata_cristata_[genbank_GCA_5F017311185.1_2021-03-09]	Proteles_cristata_cristata	Feliformia	0.4823	overlapped	<100kb	NA
Pteronura_brasiliensis_[genbank_GCA_5F004024605.1_2019-01-15]	Pteronura_brasiliensis	Musteloidea	0.948	overlapped	<100kb	not detected
Puma_concolor_[refseq_GCF_5F003327715.1_2018-07-19]	Puma_concolor	Feliformia	0.4012	overlapped	<100kb	NA
Puma_yagouaroundi_[refseq_GCF_5F014898765.1_2020-10-20]	Puma_yagouaroundi	Feliformia	0.7443	overlapped	>100kb	not detected
Spilogale_gracilis_[genbank_GCA_5F004023965.1_2019-01-15]	Spilogale_gracilis	Musteloidea	0.8233	not overlapped	diffrent_scaffold	NA
Suricata_suricatta_[refseq_GCF_5F006229205.1_2019-07-03]	Suricata_suricatta	Feliformia	0.4823	overlapped	<100kb	NA
Taxidea_taxus_jeffersonii_[genbank_GCA_5F003697995.1_2018-10-30]	Taxidea_taxus_jeffersonii	Musteloidea	0.4927	not overlapped	diffrent_scaffold	NA
Tremarctos_ornatus_[genbank_GCA_5F018398825.1_2021-05-19]	Tremarctos_ornatus	Ursoidea	0.9834	overlapped	<100kb	detected
Ursus_americanus_[genbank_GCA_5F020975775.1_2021-11-24]	Ursus_americanus	Ursoidea	0.9834	overlapped	<100kb	detected
Ursus_arctos_horribilis_[genbank_GCA_5F003584765.2_2021-10-01]	Ursus_arctos_horribilis	Ursoidea	0.9834	overlapped	<100kb	detected
Ursus_maritimus_[genbank_GCA_5F017311325.1_2021-03-10]	Ursus_maritimus	Ursoidea	0.9834	overlapped	<100kb	detected
Vulpes_lagopus_[refseq_GCF_5F018345385.1_2021-05-12]	Vulpes_lagopus	Canidae	0.815	overlapped	<100kb	not detected
Vulpes_vulpes_[refseq_GCF_5F003160815.1_2018-05-25]	Vulpes_vulpes	Canidae	0.7256	overlapped	<100kb	not detected
Zalophus_californianus_[refseq_GCF_5F009762305.2_2020-07-14]	Zalophus_californianus	Pinnipedia	0.9958	overlapped	<100kb	detected
