# Supplementary material for: Birth of protein-coding exons by ancient domestication of LINE-1 retrotransposon
Source: HighWire-hosted journal article supplement (doi:10.1101/gr.280007.124), 2025-05-08
Supplement: Supplemental_Table_S8.xlsx [file Supplemental_Table_S8.xlsx]

## Sheet: Sheet1
Supplemental Table S8. RNA-seq datasets used for expression analysis of the Lyosin transcript.
SRA	Species	Tissue	Genome for read mapping	Uniquely mapped reads (n)	Uniquely mapped reads (%)
SRR5412144	Anolis carolinensis	brain	GCF_035594765.1	15077806	0.7453
SRR5412145	Anolis carolinensis	brain	GCF_035594765.1	24805455	0.9524
SRR5412146	Anolis carolinensis	brain	GCF_035594765.1	23927632	0.9465
SRR5412147	Anolis carolinensis	brain	GCF_035594765.1	17951437	0.9516
SRR5412148	Anolis carolinensis	brain	GCF_035594765.1	20987295	0.9545
SRR5412149	Anolis carolinensis	brain	GCF_035594765.1	19668317	0.9447
SRR5412150	Anolis carolinensis	heart	GCF_035594765.1	30428655	0.9511
SRR5412151	Anolis carolinensis	heart	GCF_035594765.1	21558093	0.963
SRR5412152	Anolis carolinensis	heart	GCF_035594765.1	25383556	0.9605
SRR5412153	Anolis carolinensis	heart	GCF_035594765.1	20082737	0.9611
SRR5412154	Anolis carolinensis	heart	GCF_035594765.1	22271960	0.9634
SRR5412155	Anolis carolinensis	heart	GCF_035594765.1	20335905	0.9465
SRR5412156	Anolis carolinensis	kidney	GCF_035594765.1	19199228	0.9557
SRR5412157	Anolis carolinensis	kidney	GCF_035594765.1	26156509	0.958
SRR5412158	Anolis carolinensis	kidney	GCF_035594765.1	24840206	0.9529
SRR5412159	Anolis carolinensis	kidney	GCF_035594765.1	21793529	0.9565
SRR5412160	Anolis carolinensis	kidney	GCF_035594765.1	23310434	0.9488
SRR5412161	Anolis carolinensis	kidney	GCF_035594765.1	19943248	0.9537
SRR5412162	Anolis carolinensis	liver	GCF_035594765.1	15073535	0.9523
SRR5412163	Anolis carolinensis	liver	GCF_035594765.1	21200605	0.9603
SRR5412164	Anolis carolinensis	liver	GCF_035594765.1	16823362	0.956
SRR5412165	Anolis carolinensis	liver	GCF_035594765.1	25006841	0.95
SRR5412166	Anolis carolinensis	liver	GCF_035594765.1	18240716	0.957
SRR5412167	Anolis carolinensis	liver	GCF_035594765.1	21193001	0.9415
SRR5412168	Anolis carolinensis	ovary	GCF_035594765.1	23934902	0.9565
SRR5412169	Anolis carolinensis	ovary	GCF_035594765.1	24095738	0.9713
SRR5412170	Anolis carolinensis	ovary	GCF_035594765.1	39051823	0.9702
SRR5412171	Anolis carolinensis	testis	GCF_035594765.1	18832490	0.9149
SRR5412172	Anolis carolinensis	testis	GCF_035594765.1	22572276	0.9192
SRR5412173	Anolis carolinensis	testis	GCF_035594765.1	36341808	0.9297
SRR3208124	Alligator mississippiensis	belly skin	GCF_030867095.1	3503125	0.8206
SRR3208125	Alligator mississippiensis	cerebellum	GCF_030867095.1	2043032	0.9623
SRR3208126	Alligator mississippiensis	spinal cord	GCF_030867095.1	2426456	0.9143
SRR3208127	Alligator mississippiensis	spleen	GCF_030867095.1	1326204	0.9242
SRR3208128	Alligator mississippiensis	stomach	GCF_030867095.1	219234	0.6023
SRR3208129	Alligator mississippiensis	testis	GCF_030867095.1	2427092	0.8562
SRR3208130	Alligator mississippiensis	thalamus	GCF_030867095.1	2440236	0.9339
SRR3208131	Alligator mississippiensis	throat scent gland	GCF_030867095.1	2037130	0.9464
SRR3208132	Alligator mississippiensis	tongue	GCF_030867095.1	1524154	0.9321
SRR3208133	Alligator mississippiensis	tooth	GCF_030867095.1	495465	0.5631
SRR3208137	Alligator mississippiensis	chin glands	GCF_030867095.1	1013015	0.8679
SRR3208140	Alligator mississippiensis	eye	GCF_030867095.1	1303432	0.9463
SRR3208141	Alligator mississippiensis	heart	GCF_030867095.1	2284817	0.8491
SRR3208142	Alligator mississippiensis	kidney	GCF_030867095.1	2063317	0.939
SRR3208143	Alligator mississippiensis	liver	GCF_030867095.1	2330133	0.8941
SRR3208144	Alligator mississippiensis	midbrain	GCF_030867095.1	1979564	0.925
SRR3208146	Alligator mississippiensis	olfactory bulb	GCF_030867095.1	2864683	0.9541
SRR3208147	Alligator mississippiensis	ovary	GCF_030867095.1	3153664	0.9404
SRR19278769	Pelodiscus sinensis	testis	GCF_000230535.1	25422934	0.8754
SRR19278770	Pelodiscus sinensis	testis	GCF_000230535.1	25327646	0.8725
SRR19278771	Pelodiscus sinensis	testis	GCF_000230535.1	25486837	0.8791
SRR19278772	Pelodiscus sinensis	ovary	GCF_000230535.1	26320180	0.8826
SRR19278775	Pelodiscus sinensis	ovary	GCF_000230535.1	26321005	0.8831
SRR19278776	Pelodiscus sinensis	ovary	GCF_000230535.1	26228014	0.882
SRR7026348	Dromaius novaehollandiae	spleen	GCF_036370855.1	19160434	0.8263
SRR7026349	Dromaius novaehollandiae	spleen	GCF_036370855.1	16278605	0.8652
SRR7026350	Dromaius novaehollandiae	spleen	GCF_036370855.1	23575697	0.8472
SRR7026351	Dromaius novaehollandiae	brain	GCF_036370855.1	23446313	0.8285
SRR7026352	Dromaius novaehollandiae	brain	GCF_036370855.1	17403454	0.7317
SRR7026353	Dromaius novaehollandiae	spleen	GCF_036370855.1	18234486	0.8483
SRR7026354	Dromaius novaehollandiae	brain	GCF_036370855.1	17253473	0.7877
SRR7026355	Dromaius novaehollandiae	brain	GCF_036370855.1	14791572	0.7524
SRR7026356	Dromaius novaehollandiae	brain	GCF_036370855.1	19735190	0.7716
SRR7026357	Dromaius novaehollandiae	brain	GCF_036370855.1	19022376	0.7719
SRR7026358	Dromaius novaehollandiae	testis	GCF_036370855.1	12747854	0.6563
SRR7026359	Dromaius novaehollandiae	ovary	GCF_036370855.1	13898797	0.6949
SRR7026360	Dromaius novaehollandiae	ovary	GCF_036370855.1	17209911	0.7544
SRR7026361	Dromaius novaehollandiae	testis	GCF_036370855.1	14516579	0.7903
SRR7026362	Dromaius novaehollandiae	testis	GCF_036370855.1	14393689	0.7194
SRR7026363	Dromaius novaehollandiae	ovary	GCF_036370855.1	16275039	0.7546
SRR7026368	Dromaius novaehollandiae	spleen	GCF_036370855.1	17114233	0.8091
SRR7026369	Dromaius novaehollandiae	spleen	GCF_036370855.1	19488969	0.8321
